# Supplementary material for: Genome Scan for Selection in Structured Layer Chicken Populations Exploiting Linkage Disequilibrium Information
Source: PubMed Central journal article supplement (PMC4494984; doi:10.1371/journal.pone.0130497), 2015-07-07
Supplement: pone.0130497.s005.pdf [file pone.0130497.s005.pdf]

Supplementary Table 3. List of genes for selective sweeps detected with FLK with 0.05% threshold in white layers.

| Chr | Start     | End       | Description                                                    | FLK   |
|-----|-----------|-----------|----------------------------------------------------------------|-------|
| 1   | 621303    | 630454    | interferon regulatory factor 5                                 | 17.98 |
| 1   | 630567    | 647745    | transportin 3                                                  | 17.98 |
| 1   | 658443    | 664773    | Smoothened homolog                                             | 17.98 |
| 1   | 690901    | 708802    | Adenosylhomocysteinase                                         | 17.98 |
| 1   | 710117    | 727850    | striatin interacting protein 2                                 | 17.98 |
| 1   | 757267    | 795092    | nuclear respiratory factor 1                                   | 17.98 |
| 1   | 807182    | 849202    | ubiquitin-conjugating enzyme E2 H                              | 17.98 |
| 1   | 850460    | 859444    | nuclear-interacting partner of ALK                             | 17.98 |
| 1   | 911097    | 915397    | carboxypeptidase A5 precursor                                  | 17.98 |
| 1   | 916281    | 920045    | carboxypeptidase A1 preproprotein                              | 17.98 |
| 1   | 921538    | 929838    | Centrosomal protein of 41 kDa                                  | 17.98 |
| 1   | 935413    | 954122    | Coatomer subunit gamma                                         | 17.98 |
| 1   | 995787    | 1011804   | ankyrin repeat domain-containing protein 16                    | 17.98 |
| 1   | 1012026   | 1028924   | rab GDP dissociation inhibitor beta                            | 17.98 |
| 1   | 1016281   | 1061797   | family with sequence similarity 208, member B                  | 17.98 |
| 1   | 1068473   | 1076747   | ankyrin repeat and SOCS box protein 13                         | 17.98 |
| 1   | 1088060   | 1099472   | neuroepithelial cell-transforming gene 1 protein               | 17.98 |
| 1   | 1361642   | 1822074   | exocyst complex component 4                                    | 17.98 |
| 1   | 71808627  | 71817151  | BCL2-like 14 (apoptosis facilitator)                           | 17.82 |
| 1   | 71833436  | 71943987  | low density lipoprotein receptor-related protein 6             | 17.82 |
| 1   | 71974273  | 71980456  | MANSC domain containing 1 precursor                            | 17.82 |
| 1   | 71983303  | 72042978  | Loss of heterozygosity 12 chromosomal region 1 protein homolog | 17.82 |
| 1   | 72046586  | 72113670  | dual specificity phosphatase 16                                | 17.82 |
| 1   | 72156810  | 72166175  | G protein-coupled receptor 19                                  | 17.82 |
| 1   | 81373015  | 81656000  | Limbic system-associated membrane protein                      | 18.52 |
| 1   | 81680485  | 81734254  | growth associated protein 43                                   | 18.52 |
| 1   | 94474405  | 94635350  | glucan (1,4-alpha-), branching enzyme 1                        | 17.82 |
| 1   | 122962850 | 123267815 | FERM and PDZ domain containing 4                               | 17.82 |
| 1   | 123394258 | 123418544 | male-specific lethal 3 homolog (Drosophila)                    | 17.82 |
| 2   | 20547214  | 20632812  | multidrug resistance protein 1                                 | 21.02 |
| 2   | 20656627  | 20694939  | RUN domain-containing protein 3B                               | 21.02 |
| 2   | 20696196  | 20709565  | solute carrier family 25, member 40                            | 21.02 |
| 2   | 20711043  | 20726377  | DBF4 homolog (S. cerevisiae)                                   | 21.02 |
| 2   | 20865806  | 20874342  | sorcin                                                         | 21.02 |
| 2   | 30537280  | 30564128  | Sp4 transcription factor                                       | 18.90 |
| 2   | 30690282  | 30698829  | cell division cycle-associated 7-like protein                  | 18.90 |
| 2   | 30757166  | 30909032  | Rap guanine nucleotide exchange factor (GEF) 5                 | 18.90 |
| 2   | 30683539  | 30683661  | U5 spliceosomal RNA                                            | 18.90 |
| 2   | 37711497  | 37756128  | ubiquitin-conjugating enzyme E2E 1                             | 17.82 |

|   |           |           |                                                                                   |       |
|---|-----------|-----------|-----------------------------------------------------------------------------------|-------|
| 2 | 37769194  | 37773772  | Ribosomal protein L15                                                             | 17.82 |
| 2 | 37787391  | 37809859  | nuclear receptor subfamily 1 group D member 2                                     | 17.82 |
| 2 | 37844468  | 37965174  | Thyroid hormone receptor beta                                                     | 17.82 |
| 2 | 37698436  | 37698610  | U1 spliceosomal RNA                                                               | 17.82 |
| 2 | 134048833 | 134252747 | trichorhinophalangeal syndrome I                                                  | 21.29 |
| 2 | 134628301 | 134709262 | Eukaryotic translation initiation factor 3 subunit H                              | 21.29 |
| 3 | 9262357   | 9405997   | WD repeat containing planar cell polarity effector                                | 17.98 |
| 3 | 9406399   | 9417141   | Malate dehydrogenase, cytoplasmic                                                 | 17.98 |
| 3 | 9438436   | 9460691   | UTP--glucose-1-phosphate uridylyltransferase                                      | 17.98 |
| 3 | 9462114   | 9489472   | vacuolar protein sorting 54 homolog ( <i>S. cerevisiae</i> )                      | 17.98 |
| 3 | 9521292   | 9539167   | protein pellino homolog 1                                                         | 17.72 |
| 3 | 10359052  | 10449924  | Meis homeobox 1                                                                   | 17.72 |
| 3 | 12844082  | 12878172  | Delta-like protein                                                                | 17.98 |
| 3 | 12887313  | 12960238  | UPF0492 protein C20orf94 homolog                                                  | 17.98 |
| 3 | 12961577  | 12970854  | McKusick-Kaufman/Bardet-Biedl syndromes putative chaperonin                       | 17.98 |
| 3 | 12995964  | 13027937  | Synaptosomal-associated protein 25                                                | 17.98 |
| 3 | 16172663  | 16238767  | chromogranin B (secretogranin 1)                                                  | 17.98 |
| 3 | 16255281  | 16265499  | DNA helicase MCM8                                                                 | 17.98 |
| 3 | 16271778  | 16276722  | cardiolipin synthase 1                                                            | 17.98 |
| 3 | 16360689  | 16391192  | poly                                                                              | 17.98 |
| 3 | 16404585  | 16432600  | protein lin-9 homolog                                                             | 17.98 |
| 3 | 16453958  | 16471806  | Golgi resident protein GCP60                                                      | 17.98 |
| 3 | 16482887  | 16487420  | histone H3.2                                                                      | 17.98 |
| 3 | 16515941  | 16518570  | left-right determination factor 2 precursor                                       | 17.98 |
| 3 | 16598307  | 16603854  | signal recognition particle 9 kDa protein                                         | 17.78 |
| 3 | 74490287  | 74540828  | mitogen-activated protein kinase kinase kinase 7                                  | 17.78 |
| 3 | 74768582  | 74811042  | BTB and CNC homology 1, basic leucine zipper transcription factor 2               | 17.78 |
| 3 | 74853141  | 74946896  | Midasin                                                                           | 17.78 |
| 3 | 74953170  | 74985332  | ankyrin repeat domain 6                                                           | 17.78 |
| 3 | 74823486  | 74824862  | gap junction protein, alpha 10, 62kDa                                             | 17.78 |
| 3 | 76289510  | 76312354  | synaptotagmin binding, cytoplasmic RNA interacting protein                        | 18.02 |
| 3 | 76326433  | 76373661  | sorting nexin-14                                                                  | 18.02 |
| 3 | 76271065  | 76271131  | Small nucleolar RNA SNORD50                                                       | 18.02 |
| 3 | 76273207  | 76273277  | Small nucleolar RNA SNORD50                                                       | 18.02 |
| 4 | 4161930   | 4176418   | solute carrier family 9, subfamily A (NHE6, cation proton antiporter 6), member 6 | 26.70 |
| 4 | 4206227   | 4209911   | four and a half LIM domains 1                                                     | 26.70 |
| 4 | 4214210   | 4248185   | MAP7 domain containing 3                                                          | 26.70 |
| 4 | 4280658   | 4292346   | G protein-coupled receptor 112                                                    | 26.70 |
| 4 | 4301225   | 4305523   | bombesin receptor subtype-3                                                       | 26.70 |
| 4 | 4345180   | 4349228   | CD40 ligand CD40 ligand, membrane form CD40 ligand, soluble form                  | 26.70 |
| 4 | 4354214   | 4383568   | Rho guanine nucleotide exchange factor 6                                          | 26.70 |
| 4 | 4390057   | 4400409   | heterogeneous nuclear ribonucleoprotein G                                         | 26.70 |
| 4 | 4398822   | 4398886   | Small nucleolar RNA SNORD61                                                       | 26.70 |

|   |          |          |                                                                   |       |
|---|----------|----------|-------------------------------------------------------------------|-------|
| 4 | 57404743 | 57409306 | pituitary homeobox 2                                              | 21.42 |
| 4 | 57434843 | 57469617 | glutamyl aminopeptidase (aminopeptidase A)                        | 21.42 |
| 4 | 57576632 | 57597173 | Elongation of very long chain fatty acids protein 6               | 21.42 |
| 4 | 57631764 | 57683454 | pro-epidermal growth factor precursor                             | 21.42 |
| 4 | 57708911 | 57722892 | visual pigment-like receptor peropsin                             | 21.42 |
| 4 | 57731319 | 57744001 | complement factor I                                               | 21.42 |
| 4 | 57745870 | 57751937 | phospholipase A2, group XIIA                                      | 21.42 |
| 4 | 57754986 | 57763766 | caspase-6                                                         | 21.42 |
| 4 | 57807176 | 57923545 | PDZ and LIM domain protein 5                                      | 17.26 |
| 4 | 82408395 | 82444435 | max dimerization protein 4                                        | 17.26 |
| 4 | 82459166 | 82544586 | polymerase (DNA directed) nu                                      | 17.26 |
| 4 | 82738354 | 82761647 | negative elongation factor A                                      | 17.26 |
| 4 | 82783104 | 82842064 | Wolf-Hirschhorn syndrome candidate 1                              | 26.48 |
| 4 | 89402351 | 89584157 | exocyst complex component 6B                                      | 26.48 |
| 5 | 9538613  | 9582720  | LIM domain only 1 (rhombotin 1)                                   | 19.31 |
| 5 | 9614317  | 9626415  | resistance to inhibitors of cholinesterase 3 homolog (C. elegans) | 19.31 |
| 5 | 9634001  | 9761468  | tubby homolog (mouse)                                             | 19.31 |
| 5 | 9768005  | 9802730  | ras-related protein R-Ras2                                        | 19.31 |
| 5 | 9834069  | 9848544  | Coatomer subunit beta                                             | 19.31 |
| 5 | 9851015  | 9858153  | proteasome subunit alpha type-1                                   | 19.31 |
| 5 | 9876942  | 9951911  | cGMP-inhibited 3,5-cyclic phosphodiesterase B                     | 18.02 |
| 5 | 33438355 | 33483021 | sec1 family domain-containing protein 1                           | 18.02 |
| 5 | 33517885 | 33534657 | Cochlin                                                           | 18.02 |
| 5 | 33543459 | 33598778 | striatin, calmodulin binding protein 3                            | 18.02 |
| 5 | 33616118 | 33666611 | HECT domain containing E3 ubiquitin protein ligase 1              | 18.02 |
| 5 | 33685490 | 33736833 | HEAT repeat containing 5A                                         | 18.02 |
| 5 | 33774090 | 33856331 | nucleotide binding protein-like                                   | 18.02 |
| 5 | 34050021 | 34304671 | A kinase (PRKA) anchor protein 6                                  | 17.98 |
| 5 | 34375148 | 34959900 | neuronal PAS domain protein 3                                     | 17.78 |
| 5 | 44981707 | 44983006 | homeobox protein goosecoid                                        | 17.78 |
| 5 | 45092963 | 45128794 | endoribonuclease Dicer                                            | 17.78 |
| 5 | 45165017 | 45184249 | calmin (calponin-like, transmembrane)                             | 17.78 |
| 5 | 45270524 | 45300174 | spectrin repeat containing, nuclear envelope family member 3      | 17.78 |
| 5 | 45330738 | 45337464 | glutaredoxin-related protein 5, mitochondrial                     | 17.78 |
| 5 | 45328658 | 45328930 | Small Cajal body specific RNA 13                                  | 17.78 |
| 6 | 3953643  | 3956579  | lung lectin precursor                                             | 24.92 |
| 6 | 3961091  | 3967496  | surfactant, pulmonary-associated protein A1 precursor             | 24.92 |
| 6 | 3981178  | 3989358  | soluble mannose-binding lectin precursor                          | 24.92 |
| 6 | 4283164  | 4363396  | ret proto-oncogene precursor                                      | 24.92 |
| 6 | 14667844 | 14924979 | adenosine kinase                                                  | 26.44 |
| 6 | 14941845 | 14956153 | AP-3 complex subunit mu-1                                         | 26.44 |
| 6 | 14961440 | 14990291 | Vinculin                                                          | 26.44 |
| 6 | 15060198 | 15068452 | urokinase-type plasminogen activator preproprotein                | 26.44 |

|   |          |          |                                                                       |       |
|---|----------|----------|-----------------------------------------------------------------------|-------|
| 6 | 16111040 | 16115551 | zona pellucida sperm-binding protein 4                                | 19.30 |
| 6 | 16273210 | 16314303 | Phosphoinositide 3-kinase adapter protein 1                           | 19.30 |
| 6 | 16318282 | 16329867 | nucleolar and coiled-body phosphoprotein 1                            | 19.30 |
| 6 | 16349917 | 16354551 | ELOVL fatty acid elongase 3                                           | 19.30 |
| 6 | 16379333 | 16476177 | golgi brefeldin A resistant guanine nucleotide exchange factor 1      | 19.30 |
| 6 | 16488268 | 16493350 | nuclear factor NF-kappa-B p100 subunit                                | 19.31 |
| 6 | 24664740 | 24940362 | sortilin-related VPS10 domain containing receptor 1                   | 19.31 |
| 6 | 25264735 | 25352280 | gamma-adducin                                                         | 19.31 |
| 6 | 30060586 | 30109050 | phosphatidic acid phosphatase type 2 domain containing 1A             | 19.31 |
| 6 | 30185811 | 30223053 | WD repeat domain 11                                                   | 19.31 |
| 6 | 30411293 | 30490016 | Fibroblast growth factor receptor 2                                   | 19.31 |
| 6 | 30550113 | 30621520 | arginyl-tRNA--protein transferase 1                                   | 18.02 |
| 6 | 31636707 | 31661235 | family with sequence similarity 53, member B                          | 18.02 |
| 6 | 31686516 | 31702105 | BRISC complex subunit Abro1                                           | 18.02 |
| 6 | 32007895 | 32012786 | testis expressed 36                                                   | 18.02 |
| 6 | 32058339 | 32075635 | DEAH (Asp-Glu-Ala-His) box polypeptide 32                             | 18.02 |
| 7 | 4312646  | 4330369  | bifunctional purine biosynthesis protein PURH                         | 19.69 |
| 7 | 4333468  | 4382817  | fibronectin precursor                                                 | 19.69 |
| 7 | 4527554  | 4590262  | NEDD8-conjugating enzyme UBE2F                                        | 19.69 |
| 7 | 4591385  | 4595864  | receptor (G protein-coupled) activity modifying protein 1             | 19.69 |
| 7 | 4611641  | 4662295  | leucine rich repeat (in FLII) interacting protein 1                   | 19.69 |
| 7 | 4722132  | 4740447  | melanophilin                                                          | 19.69 |
| 7 | 4752831  | 4805577  | collagen alpha-3(VI) chain precursor                                  | 19.69 |
| 7 | 11536104 | 11616253 | pleckstrin homology domain containing, family M, member 3             | 21.24 |
| 7 | 11686741 | 11704137 | cyclic AMP-responsive element-binding protein 1                       | 21.24 |
| 7 | 11766883 | 11819797 | Kruppel-like factor 7 (ubiquitous)                                    | 21.24 |
| 7 | 11854607 | 11868058 | carboxypeptidase O                                                    | 21.24 |
| 7 | 11950838 | 12015748 | disintegrin and metalloproteinase domain-containing protein 23        | 21.24 |
| 7 | 12072509 | 12076665 | elongation factor 1-beta                                              | 21.24 |
| 7 | 12077169 | 12090936 | NADH-ubiquinone oxidoreductase 75 kDa subunit, mitochondrial          | 21.24 |
| 7 | 12107101 | 12129187 | INO80 complex subunit D                                               | 21.24 |
| 7 | 12074025 | 12074158 | Small nucleolar RNA SNORA41                                           | 21.24 |
| 7 | 12074705 | 12074740 | Small nucleolar RNA Z196/R39/R59 family                               | 21.24 |
| 7 | 15219971 | 15271809 | alkylglycerone phosphate synthase                                     | 18.46 |
| 7 | 15304546 | 15320356 | nuclear factor erythroid 2-related factor 2                           | 18.46 |
| 8 | 7564281  | 7592106  | smg-7 homolog, nonsense mediated mRNA decay factor (C. elegans)       | 19.69 |
| 8 | 7604691  | 7609670  | actin-related protein 2/3 complex subunit 5                           | 19.69 |
| 8 | 7641619  | 7708062  | ral guanine nucleotide dissociation stimulator-like 1                 | 19.69 |
| 8 | 7903724  | 7931488  | ER degradation enhancer, mannosidase alpha-like 3                     | 19.69 |
| 8 | 7933908  | 7992849  | protein Niban                                                         | 19.69 |
| 8 | 7564912  | 7565074  | U1 spliceosomal RNA                                                   | 19.69 |
| 9 | 15087461 | 15106244 | eukaryotic translation initiation factor 4E family member 2           | 22.97 |
| 9 | 15246615 | 15264143 | eukaryotic translation initiation factor 2B, subunit 5 epsilon, 82kDa | 22.97 |

|    |          |          |                                                                             |       |
|----|----------|----------|-----------------------------------------------------------------------------|-------|
| 9  | 15281328 | 15292012 | dishevelled, dsh homolog 3 (Drosophila)                                     | 22.97 |
| 9  | 15293532 | 15316234 | AP-2 complex subunit mu                                                     | 22.97 |
| 9  | 15332834 | 15340129 | von Willebrand factor A domain containing 5B2                               | 22.97 |
| 9  | 15340601 | 15343371 | ALG3, alpha-1,3- mannosyltransferase                                        | 22.97 |
| 9  | 15356178 | 15362770 | endothelin converting enzyme 2                                              | 22.97 |
| 9  | 15363725 | 15369726 | 26S proteasome non-ATPase regulatory subunit 2                              | 22.97 |
| 9  | 15371232 | 15387501 | eukaryotic translation initiation factor 4 gamma, 1                         | 22.97 |
| 9  | 15395572 | 15405268 | chloride channel, voltage-sensitive 2                                       | 22.97 |
| 9  | 15406844 | 15413438 | chordin precursor                                                           | 22.97 |
| 9  | 15419502 | 15421617 | thrombopoietin precursor                                                    | 22.97 |
| 9  | 15437757 | 15449465 | EPH receptor B3                                                             | 22.97 |
| 9  | 15380309 | 15380385 | Small nucleolar RNA SNORD66                                                 | 22.97 |
| 9  | 15381519 | 15381596 | Small nucleolar RNA SNORD66                                                 | 22.97 |
| 9  | 16565596 | 16587667 | fragile X mental retardation syndrome-related protein 1                     | 17.61 |
| 9  | 16663283 | 16672397 | tetratricopeptide repeat protein 14                                         | 17.61 |
| 9  | 16760382 | 16850020 | peroxisomal biogenesis factor 5-like                                        | 17.61 |
| 9  | 16861502 | 16902461 | Ubiquitin carboxyl-terminal hydrolase 13                                    | 17.61 |
| 9  | 16903953 | 16907474 | NADH dehydrogenase                                                          | 17.61 |
| 9  | 16911951 | 16921482 | actin-like 6A                                                               | 17.61 |
| 9  | 16984938 | 17003984 | mitofusin-1                                                                 | 17.61 |
| 9  | 16820695 | 16820798 | U6 spliceosomal RNA                                                         | 17.61 |
| 9  | 20419761 | 20464371 | cholinesterase precursor                                                    | 17.72 |
| 9  | 20586079 | 20587887 | SLIT and NTRK-like family, member 3                                         | 17.72 |
| 10 | 6434758  | 6619897  | disintegrin and metalloproteinase domain-containing protein 10 precursor    | 22.97 |
| 10 | 6572777  | 6596733  | aquaporin 9                                                                 | 22.97 |
| 10 | 6604818  | 6661741  | Retinal dehydrogenase 2                                                     | 22.97 |
| 10 | 6816944  | 6857906  | cingulin-like 1                                                             | 22.97 |
| 10 | 6903270  | 7058903  | transcription factor 12                                                     | 18.85 |
| 10 | 9545024  | 9553009  | solute carrier family 24, member 5 precursor                                | 18.85 |
| 10 | 9551752  | 9570906  | myelin expression factor 2                                                  | 18.85 |
| 10 | 9587065  | 9632792  | solute carrier family 12 (sodium/potassium/chloride transporters), member 1 | 18.85 |
| 10 | 17122370 | 17146830 | proprotein convertase subtilisin/kexin type 6                               | 17.82 |
| 10 | 17199826 | 17220109 | ankyrin repeat and death domain containing 1A                               | 17.83 |
| 10 | 18440729 | 18553284 | dual specificity mitogen-activated protein kinase kinase 5                  | 17.83 |
| 10 | 18595984 | 18624673 | E3 SUMO-protein ligase PIAS1                                                | 17.83 |
| 10 | 18632517 | 18638897 | ceroid-lipofuscinosis, neuronal 6, late infantile, variant                  | 17.83 |
| 10 | 18641302 | 18648029 | protein fem-1 homolog B                                                     | 17.83 |
| 10 | 18699925 | 18729841 | coronin, actin binding protein, 2B                                          | 17.83 |
| 10 | 18770495 | 18779187 | NADPH oxidase 5                                                             | 17.83 |
| 10 | 18807760 | 18817356 | glucuronic acid epimerase                                                   | 17.83 |
| 10 | 18823404 | 18826891 | progesterin and adipoQ receptor family member V                             | 17.83 |
| 10 | 18828578 | 18846365 | kinesin-like protein KIF23                                                  | 17.83 |
| 11 | 983068   | 995051   | E2F transcription factor 4; Uncharacterized protein                         | 21.24 |

|    |          |          |                                                                                  |       |
|----|----------|----------|----------------------------------------------------------------------------------|-------|
| 11 | 995632   | 1005522  | engulfment and cell motility 3                                                   | 21.24 |
| 11 | 1011955  | 1025358  | KIAA0895-like                                                                    | 21.24 |
| 11 | 1029318  | 1036713  | lecithin-cholesterol acyltransferase                                             | 21.24 |
| 11 | 1073882  | 1097277  | family with sequence similarity 65, member A                                     | 21.24 |
| 11 | 1102641  | 1128402  | transcriptional repressor CTCF                                                   | 21.24 |
| 11 | 1130092  | 1147360  | RGD motif, leucine rich repeats, tropomodulin domain and proline-rich containing | 21.24 |
| 11 | 1165618  | 1177771  | alanyl-tRNA synthetase, cytoplasmic                                              | 21.24 |
| 11 | 1189504  | 1194020  | fibulin 7                                                                        | 21.24 |
| 11 | 1213866  | 1215689  | tubulin polymerization-promoting protein family member 3                         | 21.24 |
| 11 | 1223848  | 1237337  | potassium channel tetramerisation domain containing 19                           | 21.24 |
| 11 | 1240508  | 1302916  | pleckstrin homology domain containing, family G (with RhoGef domain) member 4    | 21.24 |
| 11 | 1336785  | 1351404  | FH1/FH2 domain-containing protein 1                                              | 21.24 |
| 11 | 1389699  | 1391495  | agouti-related protein precursor                                                 | 21.24 |
| 11 | 1398993  | 1402340  | N-lysine methyltransferase SETD6                                                 | 21.24 |
| 11 | 1405351  | 1453089  | CCR4-NOT transcription complex, subunit 1                                        | 21.24 |
| 11 | 1424514  | 1424649  | Small nucleolar RNA SNORA46                                                      | 21.24 |
| 11 | 1432730  | 1432863  | Small nucleolar RNA SNORA76                                                      | 21.24 |
| 11 | 7596758  | 7603866  | Cytochrome b-c1 complex subunit Rieske, mitochondrial                            | 17.72 |
| 11 | 7841312  | 7844172  | processing of precursor 4                                                        | 17.72 |
| 11 | 7933476  | 7946064  | G1/S-specific cyclin-E1                                                          | 17.72 |
| 11 | 7961122  | 8028603  | URI1, prefoldin-like chaperone                                                   | 17.72 |
| 13 | 2010626  | 2012530  | leucine rich repeat transmembrane neuronal 2                                     | 30.29 |
| 13 | 2134785  | 2156387  | stress-70 protein, mitochondrial precursor                                       | 30.29 |
| 13 | 2146299  | 2146368  | Small nucleolar RNA SNORD63                                                      | 30.29 |
| 14 | 5075181  | 5086183  | DNA topoisomerase 3-alpha                                                        | 19.43 |
| 14 | 5112713  | 5127320  | phosphoribosyl pyrophosphate synthase-associated protein 2                       | 19.43 |
| 14 | 5129153  | 5157900  | solute carrier family 5 (sodium/glucose cotransporter), member 10                | 19.43 |
| 14 | 5138381  | 5150303  | family with sequence similarity 83, member G                                     | 19.43 |
| 14 | 5223282  | 5225616  | B9 protein domain 1                                                              | 19.43 |
| 14 | 5230050  | 5338554  | Voltage-dependent T-type calcium channel subunit alpha-1H                        | 19.43 |
| 14 | 9934515  | 9974931  | ubiquitin carboxyl-terminal hydrolase 7                                          | 22.75 |
| 14 | 10046044 | 10052775 | phosphomannomutase 2                                                             | 22.75 |
| 14 | 10103934 | 10114456 | methyltransferase-like protein 22                                                | 22.75 |
| 17 | 4788861  | 4790491  | ovoglycoprotein precursor                                                        | 17.26 |
| 17 | 4820725  | 4824113  | nuclear apoptosis inducing factor 1                                              | 17.26 |
| 17 | 4829664  | 4860591  | early estrogen-induced gene 1 protein                                            | 17.26 |
| 17 | 4865441  | 4867919  | dolichol phosphate-mannose biosynthesis regulatory protein                       | 17.26 |
| 17 | 4870177  | 4871635  | alpha-N-acetyl-neuraminyl-2,3-beta-galactosyl-1                                  | 17.26 |
| 17 | 4872095  | 4874530  | ST6 -N-acetylgalactosaminide alpha-2,6-sialyltransferase 6                       | 17.26 |
| 17 | 4877410  | 4880796  | Adenylate kinase isoenzyme 1                                                     | 17.26 |
| 17 | 4882932  | 4891674  | endoglin precursor                                                               | 17.26 |
| 17 | 4892549  | 4896134  | folylpolyglutamate synthase                                                      | 17.26 |
| 17 | 4896492  | 4902733  | Cyclin-dependent kinase 9                                                        | 17.26 |

|    |         |         |                                                                                |       |
|----|---------|---------|--------------------------------------------------------------------------------|-------|
| 17 | 4903795 | 4923543 | SH2 domain containing 3C                                                       | 17.26 |
| 17 | 4929079 | 4931968 | tetratricopeptide repeat domain 16                                             | 17.26 |
| 17 | 4933496 | 4946785 | cerebral endothelial cell adhesion molecule                                    | 17.26 |
| 17 | 4949346 | 4967354 | Ubiquitin-related modifier 1 homolog                                           | 17.26 |
| 17 | 4983785 | 4987536 | coenzyme Q4 homolog ( <i>S. cerevisiae</i> )                                   | 17.26 |
| 17 | 5016759 | 5075578 | dynamamin 1                                                                    | 17.82 |
| 18 | 2020996 | 2066954 | Netrin-1                                                                       | 17.82 |
| 18 | 2070106 | 2146328 | syntaxin-8                                                                     | 17.82 |
| 18 | 2180734 | 2183708 | ubiquitin specific peptidase 43                                                | 17.82 |
| 18 | 2188691 | 2205886 | Rho GTPase activating protein 44                                               | 17.82 |
| 18 | 2223389 | 2230202 | uncharacterized protein LOC417324                                              | 17.82 |
| 19 | 7951502 | 7972199 | protein phosphatase, Mg <sup>2+</sup> /Mn <sup>2+</sup> dependent, 1D          | 19.69 |
| 19 | 7979200 | 7997166 | amyloid protein-binding protein 2                                              | 19.69 |
| 19 | 8096015 | 8104574 | carbonic anhydrase IV                                                          | 19.69 |
| 19 | 8148378 | 8165006 | Gametogenetin-binding protein 2                                                | 19.69 |
| 19 | 8166412 | 8187734 | Dehydrogenase/reductase SDR family member 11                                   | 19.69 |
| 21 | 3252441 | 3261217 | G protein-coupled receptor 157                                                 | 19.69 |
| 21 | 3470173 | 3492933 | phosphatidylinositol-4,5-bisphosphate 3-kinase catalytic subunit delta isoform | 19.69 |
| 21 | 3493075 | 3527740 | calsyntenin-1 precursor                                                        | 19.69 |
| 21 | 3573056 | 3581801 | Protein LZIC                                                                   | 19.69 |
| 21 | 3581913 | 3588648 | nicotinamide nucleotide adenyltransferase 1                                    | 19.69 |
| 21 | 3590985 | 3592942 | retinol binding protein 7, cellular                                            | 19.69 |
| 21 | 3595756 | 3630094 | ubiquitination factor E4B                                                      | 19.69 |
| 21 | 3639974 | 3713856 | kinesin family member 1B                                                       | 19.69 |
| 21 | 3719439 | 3729173 | 6-phosphogluconate dehydrogenase, decarboxylating                              | 19.69 |
| 21 | 3730260 | 3733060 | Centromere protein S                                                           | 19.69 |
| 21 | 3705900 | 3706069 | TUC338                                                                         | 19.69 |
| 22 | 1256816 | 1265197 | Charged multivesicular body protein 7                                          | 19.43 |
| 22 | 1270094 | 1276295 | tumor necrosis factor receptor superfamily member 10B precursor                | 19.43 |
| 22 | 1343627 | 1375329 | exportin-7                                                                     | 19.43 |
| 22 | 1376680 | 1381157 | docking protein 2, 56kDa                                                       | 19.43 |
| 22 | 1397665 | 1418597 | GDNF family receptor alpha-2 precursor                                         | 19.43 |
| 22 | 1597651 | 1602693 | TELO2 interacting protein 2                                                    | 19.43 |
| 23 | 4570631 | 4804042 | CUB and Sushi multiple domains 2                                               | 17.82 |
| 23 | 4824370 | 4834663 | collagen, type IX, alpha 2                                                     | 17.82 |
| 23 | 4835192 | 4847417 | small ArfGAP2                                                                  | 17.82 |
| 23 | 4901524 | 4907272 | potassium voltage-gated channel, KQT-like subfamily, member 4                  | 17.82 |
| 23 | 4910836 | 4916448 | tubulointerstitial nephritis antigen-like 1                                    | 17.82 |
| 23 | 4918792 | 4920966 | penta-EF-hand domain containing 1                                              | 17.82 |
| 23 | 4921631 | 4939423 | collagen, type XVI, alpha 1                                                    | 17.82 |
| 23 | 4943828 | 4960852 | brain-specific angiogenesis inhibitor 2                                        | 17.82 |
| 24 | 2427011 | 2464846 | immunoglobulin superfamily, member 9B                                          | 19.60 |
| 24 | 2516848 | 2542717 | non-SMC condensin II complex, subunit D3                                       | 19.60 |

|    |         |         |                                                                                   |       |
|----|---------|---------|-----------------------------------------------------------------------------------|-------|
| 24 | 2553386 | 2558481 | Thymocyte nuclear protein 1                                                       | 19.60 |
| 24 | 2845500 | 2863118 | potassium-transporting ATPase alpha chain 2                                       | 19.60 |
| 24 | 2902288 | 3002638 | GRAM domain containing 1B                                                         | 22.75 |
| 24 | 4392700 | 4566947 | ubiquitin conjugation factor E4 A                                                 | 22.75 |
| 24 | 4557911 | 4561306 | RNA-binding protein 7                                                             | 22.75 |
| 24 | 4664469 | 4732605 | cell adhesion molecule 1                                                          | 22.75 |
| 26 | 2504099 | 2506388 | Interleukin-10                                                                    | 17.01 |
| 26 | 2517673 | 2519712 | interleukin 19                                                                    | 17.01 |
| 26 | 2520032 | 2531914 | polymeric immunoglobulin receptor precursor                                       | 17.01 |
| 26 | 2556703 | 2560172 | ubiquitin thioesterase OTU1                                                       | 17.01 |
| 26 | 2576519 | 2583374 | C4b-binding protein alpha chain precursor                                         | 17.01 |
| 26 | 2599568 | 2605277 | complement component (3b/4b) receptor 1-like precursor                            | 17.01 |
| 26 | 2627129 | 2639856 | complement component 4 binding protein, alpha chain precursor                     | 17.01 |
| 28 | 271548  | 395862  | Fibrillin-3; Uncharacterized protein                                              | 17.61 |
| 28 | 509129  | 534490  | heterogeneous nuclear ribonucleoprotein M                                         | 17.61 |
| 28 | 558963  | 564318  | U6 snRNA-associated Sm-like protein LSM7                                          | 17.61 |
| 28 | 564384  | 599425  | signal peptide peptidase-like 2B precursor                                        | 17.61 |
| 28 | 627972  | 628532  | translocase of inner mitochondrial membrane 13 homolog (yeast)                    | 17.61 |
| 28 | 636058  | 661825  | lamin-B2                                                                          | 17.61 |
| 28 | 676818  | 677614  | 60S ribosomal protein L36                                                         | 17.61 |
| 28 | 678763  | 694768  | lon peptidase 1, mitochondrial                                                    | 17.61 |
| 28 | 701484  | 724473  | solute carrier family 1 (high affinity aspartate/glutamate transporter), member 6 | 19.43 |
| 28 | 3410986 | 3425610 | solute carrier family 25, member 42                                               | 19.43 |
| 28 | 3470619 | 3483167 | homer homolog 3 (Drosophila)                                                      | 19.43 |
| 28 | 3489321 | 3495011 | probable ATP-dependent RNA helicase DDX49                                         | 19.43 |
| 28 | 3495159 | 3499962 | Coatmer subunit epsilon                                                           | 19.43 |
| 28 | 3514060 | 3516165 | growth differentiation factor 3                                                   | 19.43 |
| 28 | 3517866 | 3537861 | UPF1 regulator of nonsense transcripts homolog (yeast)                            | 19.43 |
| 28 | 3651445 | 3653912 | cytokine receptor-like factor 1                                                   | 19.43 |
| 28 | 3657472 | 3659967 | KxDL motif containing 1                                                           | 19.43 |
| 28 | 3666228 | 3700318 | RNA polymerase II elongation factor ELL                                           | 19.43 |
| 28 | 3728960 | 3735148 | LSM4 homolog, U6 small nuclear RNA associated ( <i>S. cerevisiae</i> )            | 19.43 |
| 28 | 3748373 | 3753211 | phosphodiesterase 4C, cAMP-specific                                               | 19.43 |
| 28 | 3758472 | 3759385 | MPV17 mitochondrial membrane protein-like 2                                       | 19.43 |
| 28 | 3759501 | 3762347 | Interferon-gamma-inducible lysosomal thiol reductase                              | 19.43 |
| 28 | 3782857 | 3800231 | microtubule associated serine/threonine kinase 3                                  | 19.43 |
| 28 | 3800995 | 3805633 | interleukin 12 receptor, beta 1                                                   | 19.43 |
| 28 | 3810197 | 3816386 | arrestin domain containing 2                                                      | 19.43 |
| 28 | 3820870 | 3825356 | peroxisomal membrane protein 11C                                                  | 19.43 |
| 28 | 3878507 | 3912897 | Tyrosine-protein kinase receptor                                                  | 19.43 |
