# Supplementary material for: Genome Scan for Selection in Structured Layer Chicken Populations Exploiting Linkage Disequilibrium Information
Source: PubMed Central journal article supplement (PMC4494984; doi:10.1371/journal.pone.0130497), 2015-07-07
Supplement: pone.0130497.s007.pdf [file pone.0130497.s007.pdf]

Supplementary Table 5. Lists of pathways and gene ontologies under selection with FLK with 0.05% threshold in all layers.

| Description                                                             | # Genes anotated | Genes of pathways (%)* | P-Value |
|-------------------------------------------------------------------------|------------------|------------------------|---------|
| membrane                                                                | 22               | 1.1                    | 0.000   |
| integral to membrane                                                    | 21               | 1.3                    | 0.000   |
| zinc ion binding                                                        | 18               | 1.5                    | 0.000   |
| intracellular                                                           | 18               | 1.5                    | 0.000   |
| plasma membrane                                                         | 15               | 1.5                    | 0.000   |
| Metabolic pathways                                                      | 17               | 12.5                   | 0.000   |
| ATP binding                                                             | 19               | 1.8                    | 0.000   |
| DNA binding                                                             | 16               | 1.7                    | 0.000   |
| nucleotide binding                                                      | 17               | 1.8                    | 0.000   |
| mitochondrion                                                           | 17               | 1.9                    | 0.000   |
| regulation of transcription, DNA-dependent                              | 15               | 1.9                    | 0.000   |
| signal transduction                                                     | 17               | 2.2                    | 0.000   |
| metal ion binding                                                       | 14               | 2.0                    | 0.001   |
| COPI-coated vesicle membrane                                            | 3                | 60.0                   | 0.001   |
| maintenance of DNA methylation                                          | 3                | 60.0                   | 0.001   |
| nucleic acid binding                                                    | 13               | 2.1                    | 0.002   |
| intercellular bridge                                                    | 3                | 50.0                   | 0.002   |
| protein K63-linked deubiquitination                                     | 4                | 30.8                   | 0.002   |
| cellular response to oxidative stress                                   | 4                | 28.6                   | 0.003   |
| positive regulation of transcription from RNA polymerase II promoter    | 9                | 2.0                    | 0.004   |
| G-protein coupled receptor signaling pathway                            | 8                | 1.9                    | 0.004   |
| COPI vesicle coat                                                       | 3                | 37.5                   | 0.005   |
| exocyst                                                                 | 3                | 37.5                   | 0.005   |
| regulation of cell size                                                 | 3                | 37.5                   | 0.005   |
| endoplasmic reticulum unfolded protein response                         | 4                | 23.5                   | 0.006   |
| urogenital system development                                           | 3                | 30.0                   | 0.009   |
| sequence-specific DNA binding transcription factor activity             | 13               | 2.4                    | 0.009   |
| ubiquitin ligase complex                                                | 5                | 16.7                   | 0.011   |
| retinoic acid receptor signaling pathway                                | 3                | 27.3                   | 0.012   |
| Neuroactive ligand-receptor interaction                                 | 5                | 12.5                   | 0.012   |
| protein phosphorylation                                                 | 12               | 2.4                    | 0.013   |
| regulation of cyclin-dependent protein serine/threonine kinase activity | 4                | 17.4                   | 0.019   |
| vesicle docking involved in exocytosis                                  | 3                | 23.1                   | 0.019   |
| cytosol                                                                 | 9                | 2.2                    | 0.021   |
| sequence-specific DNA binding                                           | 11               | 2.4                    | 0.022   |
| ubiquitin-specific protease activity                                    | 5                | 13.9                   | 0.023   |
| dorsal/ventral neural tube patterning                                   | 3                | 21.4                   | 0.024   |
| Golgi apparatus                                                         | 10               | 2.4                    | 0.024   |
| transferase activity, transferring phosphorus-containing groups         | 12               | 2.5                    | 0.026   |

|                                                                |    |      |       |
|----------------------------------------------------------------|----|------|-------|
| positive regulation of proteolysis                             | 3  | 20.0 | 0.029 |
| endoplasmic reticulum                                          | 8  | 2.2  | 0.029 |
| cell periphery                                                 | 4  | 14.8 | 0.033 |
| one-carbon metabolic process                                   | 3  | 18.8 | 0.034 |
| ATP metabolic process                                          | 3  | 18.8 | 0.034 |
| guanyl-nucleotide exchange factor activity                     | 6  | 11.1 | 0.036 |
| signal transducer activity                                     | 8  | 2.3  | 0.038 |
| G-protein coupled receptor activity                            | 8  | 2.3  | 0.038 |
| negative regulation of intrinsic apoptotic signaling pathway   | 3  | 17.6 | 0.040 |
| negative regulation of tumor necrosis factor production        | 3  | 17.6 | 0.040 |
| One carbon pool by folate                                      | 3  | 12.5 | 0.040 |
| Galactose metabolism                                           | 4  | 12.5 | 0.040 |
| protein kinase activity                                        | 12 | 2.6  | 0.041 |
| negative regulation of NF-kappaB transcription factor activity | 4  | 13.8 | 0.042 |
| transcription, DNA-dependent                                   | 6  | 2.1  | 0.044 |
| extracellular region                                           | 11 | 2.6  | 0.046 |
| hair follicle morphogenesis                                    | 3  | 16.7 | 0.047 |
| positive regulation of fat cell differentiation                | 3  | 16.7 | 0.047 |
| G2 DNA damage checkpoint                                       | 3  | 16.7 | 0.047 |
| ubiquitin thiolesterase activity                               | 6  | 10.3 | 0.049 |

\*Percentage of the genes of the pathway which were among the annotated genes.
