# Supplementary material for: Genome Scan for Selection in Structured Layer Chicken Populations Exploiting Linkage Disequilibrium Information
Source: PubMed Central journal article supplement (PMC4494984; doi:10.1371/journal.pone.0130497), 2015-07-07
Supplement: pone.0130497.s011.pdf [file pone.0130497.s011.pdf]

Supplementary Table 9. List of genes for selective sweeps detected with hapFLK with 0.05% threshold in all layers.

| Chr | Start     | End       | Description                                                                       | hapFLK |
|-----|-----------|-----------|-----------------------------------------------------------------------------------|--------|
| 1   | 50719186  | 50733066  | DMC1 dosage suppressor of mck1 homolog, meiosis-specific homologous recombination | 7.91   |
| 1   | 50753266  | 50759412  | KDEL receptor 3                                                                   | 7.91   |
| 1   | 50770322  | 50773091  | Inward-rectifying potassium channel cKir2.3; Uncharacterized protein              | 7.91   |
| 1   | 50788491  | 50804577  | casein kinase I isoform epsilon                                                   | 7.91   |
| 1   | 50832960  | 50835917  | Transcription factor MafF                                                         | 7.91   |
| 1   | 50836439  | 50854357  | 85 kDa calcium-independent phospholipase A2                                       | 7.91   |
| 1   | 50856306  | 50864314  | BAI1-associated protein 2-like 2                                                  | 7.91   |
| 1   | 50865712  | 50873377  | Monocarboxylate transporter 3                                                     | 7.91   |
| 1   | 50911765  | 50921215  | Transcription factor SOX-10                                                       | 7.91   |
| 1   | 50924002  | 50927570  | DNA-directed RNA polymerases I, II, and III subunit RPABC2                        | 7.91   |
| 1   | 50931992  | 50950143  | MICAL-like protein 1                                                              | 7.91   |
| 1   | 50953763  | 50963376  | Eukaryotic translation initiation factor 3 subunit L                              | 7.91   |
| 1   | 50979163  | 50980997  | galanin receptor type 3                                                           | 7.91   |
| 1   | 51010961  | 51014093  | Beta-galactoside-binding lectin                                                   | 7.91   |
| 1   | 51026210  | 51029611  | pyridoxal (pyridoxine, vitamin B6) phosphatase                                    | 7.91   |
| 1   | 51050593  | 51062352  | lectin, galactoside-binding, soluble, 2                                           | 7.91   |
| 1   | 51065196  | 51067106  | CDC42 effector protein (Rho GTPase binding) 1                                     | 7.91   |
| 1   | 51083236  | 51095519  | caspase recruitment domain family, member 10                                      | 7.91   |
| 1   | 51099652  | 51110327  | MFNG O-fucosylpeptide 3-beta-N-acetylglucosaminyltransferase                      | 7.91   |
| 1   | 51229151  | 51248424  | cytohesin-4                                                                       | 7.91   |
| 1   | 51257450  | 51266551  | ras-related C3 botulinum toxin substrate 2                                        | 7.91   |
| 1   | 51269724  | 51274129  | somatostatin receptor type 3                                                      | 7.91   |
| 1   | 51336790  | 51344019  | potassium channel tetramerisation domain containing 17                            | 7.91   |
| 1   | 51349989  | 51355027  | Sulfurtransferase                                                                 | 7.91   |
| 1   | 51355166  | 51362344  | thiosulfate sulfurtransferase                                                     | 7.91   |
| 1   | 51419978  | 51430209  | neutrophil cytosol factor 4                                                       | 7.91   |
| 1   | 51455040  | 51463393  | Parvalbumin, muscle                                                               | 7.91   |
| 1   | 51573280  | 51580672  | thioredoxin, mitochondrial                                                        | 7.91   |
| 1   | 51598550  | 51666512  | myosin-9                                                                          | 7.91   |
| 1   | 50983576  | 50984295  | noggin 4 precursor                                                                | 7.91   |
| 1   | 50991976  | 50992548  | Histone H5                                                                        | 7.91   |
| 1   | 51511551  | 51511715  | TUC338                                                                            | 7.91   |
| 1   | 5715214   | 5839991   | CUGBP Elav-like family member 2                                                   | 1.79   |
| 1   | 8177104   | 8318907   | Semaphorin-3D                                                                     | 1.79   |
| 1   | 8522175   | 8850302   | semaphorin-3A                                                                     | 1.79   |
| 1   | 127508430 | 127539291 | protein kinase, X-linked                                                          | 1.81   |
| 1   | 127679910 | 127698770 | matrix-remodelling associated 5                                                   | 1.81   |
| 1   | 127805905 | 127818492 | arylsulfatase H precursor                                                         | 1.81   |
| 1   | 127871298 | 127881303 | glycogenin 2                                                                      | 1.81   |

|    |           |           |                                                                          |      |
|----|-----------|-----------|--------------------------------------------------------------------------|------|
| 1  | 127916919 | 127941663 | CD99 antigen precursor                                                   | 1.81 |
| 2  | 134048833 | 134252747 | trichorhinophalangeal syndrome I                                         | 7.85 |
| 2  | 134628301 | 134709262 | Eukaryotic translation initiation factor 3 subunit H                     | 7.85 |
| 2  | 134749874 | 134773800 | double-strand-break repair protein rad21 homolog                         | 7.85 |
| 2  | 11735794  | 11743710  | Krueppel-like factor 6                                                   | 1.81 |
| 2  | 73536943  | 73537003  | Small nucleolar RNA R11/Z151                                             | 1.81 |
| 2  | 113502155 | 113517713 | tocopherol (alpha) transfer protein                                      | 1.81 |
| 2  | 113543309 | 113551391 | YTH domain family protein 3                                              | 1.81 |
| 2  | 114472659 | 114503139 | Armadillo repeat-containing protein 1                                    | 1.81 |
| 2  | 113888475 | 113888659 | TUC338                                                                   | 1.81 |
| 2  | 142700486 | 142776708 | KH domain containing, RNA binding, signal transduction associated 3      | 1.81 |
| 3  | 6450555   | 7094776   | neurexin-1-alpha isoform 1 precursor                                     | 1.81 |
| 3  | 34322339  | 34455636  | v-akt murine thymoma viral oncogene homolog 3 (protein kinase B, gamma)  | 1.81 |
| 3  | 34464087  | 34563969  | serologically defined colon cancer antigen 8                             | 1.81 |
| 3  | 34813540  | 34977620  | inactive phospholipase D5                                                | 1.81 |
| 3  | 35065030  | 35080589  | exonuclease 1                                                            | 1.81 |
| 3  | 35088960  | 35147574  | WD repeat domain 64                                                      | 1.81 |
| 3  | 35238582  | 35471485  | regulator of G-protein signaling 7                                       | 1.81 |
| 3  | 35212222  | 35213478  | GPI mannosyltransferase 1                                                | 1.81 |
| 6  | 14411231  | 14417212  | voltage-dependent anion-selective channel protein 2                      | 8.06 |
| 6  | 14522141  | 14541652  | Dual specificity phosphatase DUPD1                                       | 8.06 |
| 6  | 14667844  | 14924979  | adenosine kinase                                                         | 8.06 |
| 6  | 14941845  | 14956153  | AP-3 complex subunit mu-1                                                | 8.06 |
| 6  | 14961440  | 14990291  | Vinculin                                                                 | 8.06 |
| 6  | 15060198  | 15068452  | urokinase-type plasminogen activator preproprotein                       | 8.06 |
| 13 | 1767729   | 1785069   | endothelial cell surface expressed chemotaxis and apoptosis regulator    | 8.38 |
| 13 | 1788284   | 1799938   | dnaJ homolog subfamily C member 18                                       | 8.38 |
| 13 | 1806725   | 1808111   | marginal zone B and B1 cell-specific protein                             | 8.38 |
| 13 | 1813947   | 1819364   | Polyadenylate-binding protein-interacting protein 2                      | 8.38 |
| 13 | 1825981   | 1851149   | matrin-3                                                                 | 8.38 |
| 13 | 2010626   | 2012530   | leucine rich repeat transmembrane neuronal 2                             | 8.38 |
| 13 | 2134785   | 2156387   | stress-70 protein, mitochondrial precursor                               | 8.38 |
| 13 | 2567435   | 2611832   | fibroblast growth factor 18 precursor                                    | 8.38 |
| 13 | 2641231   | 2651587   | nucleophosmin                                                            | 8.38 |
| 13 | 2681554   | 2828621   | RAN binding protein 17                                                   | 8.38 |
| 13 | 2146299   | 2146368   | Small nucleolar RNA SNORD63                                              | 8.38 |
| 13 | 10000421  | 10264193  | transcription factor COE1                                                | 1.81 |
| 13 | 10554868  | 10603091  | clathrin interactor 1                                                    | 1.81 |
| 13 | 10618933  | 10623222  | LSM11, U7 small nuclear RNA associated                                   | 1.81 |
| 13 | 10624187  | 10630514  | probable tRNA(His) guanylyltransferase                                   | 1.81 |
| 13 | 10642122  | 10669352  | disintegrin and metalloproteinase domain-containing protein 19 precursor | 1.81 |
| 13 | 10668257  | 10680834  | NIPA-like domain containing 4                                            | 1.81 |
| 13 | 10737034  | 10764716  | IL2-inducible T-cell kinase                                              | 1.81 |

|    |          |          |                                                                                   |      |
|----|----------|----------|-----------------------------------------------------------------------------------|------|
| 13 | 10778915 | 10785137 | hepatitis A virus cellular receptor 1 precursor                                   | 1.81 |
| 27 | 3080955  | 3092426  | histone acetyltransferase MYST2                                                   | 8.98 |
| 27 | 3121453  | 3124525  | solute carrier family 35 member B1                                                | 8.98 |
| 27 | 3204183  | 3219385  | tumor necrosis factor receptor superfamily member 16 precursor                    | 8.98 |
| 27 | 3252521  | 3267354  | membrane protein, palmitoylated 3 (MAGUK p55 subfamily member 3)                  | 8.98 |
| 27 | 3315353  | 3321406  | homeobox protein MOX-1                                                            | 8.98 |
| 27 | 3335561  | 3350183  | ets variant 4                                                                     | 8.98 |
| 27 | 3352213  | 3364975  | DEAH (Asp-Glu-Ala-His) box polypeptide 8                                          | 8.98 |
| 27 | 3366784  | 3370919  | Prohibitin                                                                        | 8.98 |
| 27 | 3413412  | 3417057  | phosphoethanolamine/phosphocholine phosphatase                                    | 8.98 |
| 27 | 3423443  | 3425719  | guanine nucleotide binding protein , gamma transducing activity polypeptide 2     | 8.98 |
| 27 | 3433057  | 3459259  | Insulin-like growth factor 2 mRNA-binding protein 1                               | 8.98 |
| 27 | 3468107  | 3475761  | gastric inhibitory polypeptide precursor                                          | 8.98 |
| 27 | 3495909  | 3506537  | calcium binding and coiled-coil domain 2                                          | 8.98 |
| 27 | 3586132  | 3589844  | Hoxb-7                                                                            | 8.98 |
| 27 | 3598354  | 3600970  | homeobox B6                                                                       | 8.98 |
| 27 | 3604171  | 3606516  | Homeobox protein Hox-B5                                                           | 8.98 |
| 27 | 3621645  | 3626317  | homeobox protein Hox-B4                                                           | 8.98 |
| 27 | 3643412  | 3649970  | homeobox protein Hox-B3                                                           | 8.98 |
| 27 | 3652538  | 3655356  | homeobox B2                                                                       | 8.98 |
| 27 | 3662963  | 3664600  | homeobox B1                                                                       | 8.98 |
| 27 | 3711055  | 3815879  | src kinase associated phosphoprotein 1                                            | 8.98 |
| 27 | 3842373  | 3850380  | chromobox protein homolog 1                                                       | 8.98 |
| 27 | 3855203  | 3861688  | Nuclear factor erythroid 2-related factor 1                                       | 8.98 |
| 27 | 3865615  | 3868783  | CDK5 regulatory subunit associated protein 3                                      | 8.98 |
| 27 | 3896638  | 3899664  | leucine rich repeat containing 46                                                 | 8.98 |
| 27 | 3902862  | 3907297  | oxysterol binding protein-like 7                                                  | 8.98 |
| 27 | 3971094  | 4005910  | myeloid/lymphoid or mixed-lineage leukemia ; translocated to, 6                   | 8.98 |
| 27 | 4006813  | 4007489  | CDGSH iron sulfur domain 3                                                        | 8.98 |
| 27 | 4008146  | 4011942  | polycomb group ring finger 2                                                      | 8.98 |
| 27 | 4014223  | 4017030  | Proteasome subunit beta type                                                      | 8.98 |
| 27 | 4046906  | 4048844  | ribosomal protein L23                                                             | 8.98 |
| 27 | 4053819  | 4068552  | LIM and SH3 domain protein 1                                                      | 8.98 |
| 27 | 3869421  | 3870521  | proline rich 15-like                                                              | 8.98 |
| 27 | 3155867  | 3156043  | TUC338                                                                            | 8.98 |
| 27 | 4047757  | 4047888  | Small nucleolar RNA SNORA21                                                       | 8.98 |
| 28 | 627972   | 628532   | translocase of inner mitochondrial membrane 13 homolog (yeast)                    | 7.93 |
| 28 | 636058   | 661825   | lamin-B2                                                                          | 7.93 |
| 28 | 676818   | 677614   | 60S ribosomal protein L36                                                         | 7.93 |
| 28 | 678763   | 694768   | lon peptidase 1, mitochondrial                                                    | 7.93 |
| 28 | 701484   | 724473   | solute carrier family 1 (high affinity aspartate/glutamate transporter), member 6 | 7.93 |
| 28 | 746840   | 778361   | RAN binding protein 3                                                             | 7.93 |
| 28 | 789271   | 792789   | kelch-like family member 33                                                       | 7.93 |

|    |         |         |                                                                         |      |
|----|---------|---------|-------------------------------------------------------------------------|------|
| 28 | 803320  | 808851  | butyrophilin subfamily 1 member A1 precursor                            | 7.93 |
| 28 | 832292  | 846222  | ras-related protein Rab-11B                                             | 7.93 |
| 28 | 877452  | 886036  | KN motif and ankyrin repeat domains 3                                   | 7.93 |
| 28 | 899423  | 901661  | anti-dorsalizing morphogenetic protein precursor                        | 7.93 |
| 28 | 932572  | 950125  | ELAV-like protein 1                                                     | 7.93 |
| 28 | 961655  | 965629  | megakaryocyte-associated tyrosine kinase                                | 7.93 |
| 28 | 972503  | 976394  | Retinal homeobox protein Rx1                                            | 7.93 |
| 28 | 976369  | 983104  | mucosa-associated lymphoid tissue lymphoma translocation protein 1-like | 7.93 |
| 28 | 991289  | 1002123 | tight junction protein 3                                                | 7.93 |
| 28 | 1036061 | 1041471 | cactin, spliceosome C complex subunit                                   | 7.93 |
| 28 | 1041856 | 1045661 | thromboxane A2 receptor                                                 | 7.93 |
| 28 | 1047302 | 1049378 | GIPC PDZ domain containing family, member 3                             | 7.93 |
| 28 | 1049765 | 1054525 | high mobility group 20B                                                 | 7.93 |
| 28 | 1086890 | 1089949 | Deoxyhypusine hydroxylase                                               | 7.93 |
| 28 | 1102700 | 1127154 | unc-13 homolog A (C. elegans)                                           | 7.93 |
| 28 | 1143774 | 1145084 | phosphatidic acid phosphatase type 2C                                   | 7.93 |
| 28 | 1171971 | 1179236 | amino-terminal enhancer of split                                        | 7.93 |
| 28 | 1195931 | 1202586 | guanine nucleotide-binding protein subunit alpha-11                     | 7.93 |
| 28 | 1218202 | 1225645 | nicalin precursor                                                       | 7.93 |
| 28 | 1233711 | 1264738 | CUGBP, Elav-like family member 5                                        | 7.93 |
| 28 | 1266179 | 1271107 | Hydroxysteroid 11-beta-dehydrogenase 1-like protein                     | 7.93 |
| 28 | 1303285 | 1407097 | MPN domain containing                                                   | 7.93 |
| 28 | 1414197 | 1415393 | Zinc finger and BTB domain-containing protein 7A                        | 7.93 |
| 28 | 1420886 | 1434153 | protein inhibitor of activated STAT, 4                                  | 7.93 |
| 28 | 1438607 | 1446530 | elongation factor 2                                                     | 7.93 |
| 28 | 1447842 | 1453358 | death-associated protein kinase 3                                       | 7.93 |
| 28 | 1455327 | 1459014 | nicotinamide riboside kinase 2                                          | 7.93 |
| 28 | 1463358 | 1478145 | ataxia, cerebellar, Cayman type                                         | 7.93 |
| 28 | 1507549 | 1509672 | neurturin                                                               | 7.93 |
| 28 | 1442292 | 1442361 | Small nucleolar RNA SNORD37                                             | 7.93 |
