# Supplementary material for: Genome Scan for Selection in Structured Layer Chicken Populations Exploiting Linkage Disequilibrium Information
Source: PubMed Central journal article supplement (PMC4494984; doi:10.1371/journal.pone.0130497), 2015-07-07
Supplement: pone.0130497.s014.pdf [file pone.0130497.s014.pdf]

Supplementary Table 12. Lists of pathways and gene ontologies under selection with hapFLK with 0.05% threshold in all layers.

| Description                                                     | # Genes anotated | Genes of pathways (%)* | P-Value |
|-----------------------------------------------------------------|------------------|------------------------|---------|
| protein binding                                                 | 2                | 2.0                    | 0.000   |
| apical junction assembly                                        | 2                | 28.6                   | 0.000   |
| epithelial cell-cell adhesion                                   | 2                | 28.6                   | 0.000   |
| cadherin binding                                                | 2                | 14.3                   | 0.001   |
| adherens junction                                               | 2                | 10.5                   | 0.001   |
| cell-cell adherens junction                                     | 2                | 9.1                    | 0.002   |
| mitochondrial nucleoid                                          | 2                | 7.4                    | 0.002   |
| integrin activation                                             | 1                | 50.0                   | 0.005   |
| intracellular organelle                                         | 1                | 50.0                   | 0.005   |
| L-ascorbic acid transport                                       | 1                | 50.0                   | 0.005   |
| L-ascorbic acid transporter activity                            | 1                | 50.0                   | 0.005   |
| mediator complex binding                                        | 1                | 50.0                   | 0.005   |
| meiotic cohesin complex                                         | 1                | 50.0                   | 0.005   |
| negative regulation of integrin-mediated signaling pathway      | 1                | 50.0                   | 0.005   |
| positive regulation of RNA splicing                             | 1                | 50.0                   | 0.005   |
| regulation of endodeoxyribonuclease activity                    | 1                | 50.0                   | 0.005   |
| regulation of relaxation of cardiac muscle                      | 1                | 50.0                   | 0.005   |
| sodium-dependent L-ascorbate transmembrane transporter activity | 1                | 50.0                   | 0.005   |
| transepithelial L-ascorbic acid transport                       | 1                | 50.0                   | 0.005   |
| beta-catenin binding                                            | 2                | 4.7                    | 0.006   |
| nucleosome assembly                                             | 2                | 4.3                    | 0.007   |
| bradykinin catabolic process                                    | 1                | 33.3                   | 0.008   |
| calcium-dependent cell-cell adhesion                            | 1                | 33.3                   | 0.008   |
| cellular response to indole-3-methanol                          | 1                | 33.3                   | 0.008   |
| dehydroascorbic acid transporter activity                       | 1                | 33.3                   | 0.008   |
| endoplasmic reticulum chaperone complex                         | 1                | 33.3                   | 0.008   |
| negative regulation of DNA endoreduplication                    | 1                | 33.3                   | 0.008   |
| nuclear meiotic cohesin complex                                 | 1                | 33.3                   | 0.008   |
| regulation of B cell proliferation                              | 1                | 33.3                   | 0.008   |
| regulation of receptor activity                                 | 1                | 33.3                   | 0.008   |
| translation release factor activity, codon specific             | 1                | 33.3                   | 0.008   |
| type 1 fibroblast growth factor receptor binding                | 1                | 33.3                   | 0.008   |
| type 2 fibroblast growth factor receptor binding                | 1                | 33.3                   | 0.008   |
| zonula adherens                                                 | 1                | 33.3                   | 0.008   |
| adherens junction assembly                                      | 1                | 25.0                   | 0.011   |
| AMP biosynthetic process                                        | 1                | 25.0                   | 0.011   |
| dehydroascorbic acid transport                                  | 1                | 25.0                   | 0.011   |
| fibrinolysis                                                    | 1                | 25.0                   | 0.011   |
| negative regulation of cell motility                            | 1                | 25.0                   | 0.011   |

|                                                                                         |   |      |       |
|-----------------------------------------------------------------------------------------|---|------|-------|
| negative regulation of centrosome duplication                                           | 1 | 25.0 | 0.011 |
| negative regulation of protein kinase activity by regulation of protein phosphorylation | 1 | 25.0 | 0.011 |
| regulation of smooth muscle cell migration                                              | 1 | 25.0 | 0.011 |
| smooth muscle cell migration                                                            | 1 | 25.0 | 0.011 |
| translation repressor activity                                                          | 1 | 25.0 | 0.011 |
| translational termination                                                               | 1 | 25.0 | 0.011 |
| voltage-gated anion channel activity                                                    | 1 | 25.0 | 0.011 |
| alpha-catenin binding                                                                   | 1 | 20.0 | 0.013 |
| dystroglycan binding                                                                    | 1 | 20.0 | 0.013 |
| labyrinthine layer development                                                          | 1 | 20.0 | 0.013 |
| MOZ/MORF histone acetyltransferase complex                                              | 1 | 20.0 | 0.013 |
| negative regulation of neuroblast proliferation                                         | 1 | 20.0 | 0.013 |
| negative regulation of translational initiation                                         | 1 | 20.0 | 0.013 |
| neuron fate specification                                                               | 1 | 20.0 | 0.013 |
| purine ribonucleoside salvage                                                           | 1 | 20.0 | 0.013 |
| regulation of centriole replication                                                     | 1 | 20.0 | 0.013 |
| regulation of respiratory gaseous exchange by neurological system process               | 1 | 20.0 | 0.013 |
| Tat protein binding                                                                     | 1 | 20.0 | 0.013 |
| calmodulin-dependent protein kinase activity                                            | 1 | 16.7 | 0.016 |
| catenin complex                                                                         | 1 | 16.7 | 0.016 |
| establishment or maintenance of cell polarity                                           | 1 | 16.7 | 0.016 |
| lateral element                                                                         | 1 | 16.7 | 0.016 |
| mitotic spindle organization                                                            | 1 | 16.7 | 0.016 |
| ribosomal small subunit binding                                                         | 1 | 16.7 | 0.016 |
| spindle pole centrosome                                                                 | 1 | 16.7 | 0.016 |
| cell-cell junction                                                                      | 2 | 2.7  | 0.017 |
| gamma-catenin binding                                                                   | 1 | 14.3 | 0.019 |
| regulation of anion transport                                                           | 1 | 14.3 | 0.019 |
| phosphotransferase activity, alcohol group as acceptor                                  | 2 | 2.4  | 0.021 |
| MAP kinase tyrosine/serine/threonine phosphatase activity                               | 1 | 12.5 | 0.021 |
| O-methyltransferase activity                                                            | 1 | 12.5 | 0.021 |
| positive regulation of extrinsic apoptotic signaling pathway in absence of ligand       | 1 | 12.5 | 0.021 |
| protein kinase inhibitor activity                                                       | 1 | 12.5 | 0.021 |
| regulation of DNA replication                                                           | 1 | 12.5 | 0.021 |
| vinculin binding                                                                        | 1 | 12.5 | 0.021 |
| acetyltransferase activity                                                              | 1 | 11.1 | 0.024 |
| costamere                                                                               | 1 | 11.1 | 0.024 |
| regulation of cell adhesion mediated by integrin                                        | 1 | 11.1 | 0.024 |
| regulation of cell proliferation                                                        | 2 | 2.2  | 0.024 |
| structural molecule activity                                                            | 2 | 2.2  | 0.025 |
| fascia adherens                                                                         | 1 | 10.0 | 0.027 |
| MAP kinase activity                                                                     | 1 | 10.0 | 0.027 |

|                                                                                   |   |     |       |
|-----------------------------------------------------------------------------------|---|-----|-------|
| dynein binding                                                                    | 1 | 9.1 | 0.029 |
| meiosis                                                                           | 1 | 9.1 | 0.029 |
| actin cytoskeleton                                                                | 2 | 2.0 | 0.030 |
| nucleoplasm                                                                       | 2 | 1.9 | 0.032 |
| basal plasma membrane                                                             | 1 | 8.3 | 0.032 |
| ceramide biosynthetic process                                                     | 1 | 8.3 | 0.032 |
| protein destabilization                                                           | 1 | 8.3 | 0.032 |
| SCF-dependent proteasomal ubiquitin-dependent protein catabolic process           | 1 | 8.3 | 0.032 |
| anterograde synaptic vesicle transport                                            | 1 | 7.7 | 0.035 |
| morphogenesis of an epithelium                                                    | 1 | 7.7 | 0.035 |
| respiratory gaseous exchange                                                      | 1 | 7.7 | 0.035 |
| nucleus                                                                           | 2 | 2.1 | 0.037 |
| anterograde axon cargo transport                                                  | 1 | 7.1 | 0.037 |
| glycogen metabolic process                                                        | 1 | 7.1 | 0.037 |
| protein export from nucleus                                                       | 1 | 7.1 | 0.037 |
| protein localization to cell surface                                              | 1 | 7.1 | 0.037 |
| anion transport                                                                   | 1 | 6.7 | 0.040 |
| cell fate specification                                                           | 1 | 6.7 | 0.040 |
| histone acetylation                                                               | 1 | 6.7 | 0.040 |
| positive regulation of proteolysis                                                | 1 | 6.7 | 0.040 |
| positive regulation of smoothened signaling pathway                               | 1 | 6.7 | 0.040 |
| protein dimerization activity                                                     | 2 | 1.7 | 0.042 |
| aminopeptidase activity                                                           | 1 | 6.3 | 0.042 |
| cell aging                                                                        | 1 | 6.3 | 0.042 |
| RNA metabolic process                                                             | 1 | 6.3 | 0.042 |
| sodium ion transmembrane transport                                                | 1 | 6.3 | 0.042 |
| negative regulation of intrinsic apoptotic signaling pathway                      | 1 | 5.9 | 0.045 |
| protein methylation                                                               | 1 | 5.9 | 0.045 |
| intercalated disc                                                                 | 1 | 5.6 | 0.048 |
| negative regulation of extrinsic apoptotic signaling pathway in absence of ligand | 1 | 5.6 | 0.048 |

\*Percentage of the genes of the pathway which were among the annotated genes.
