# Supplementary material for: Genome Scan for Selection in Structured Layer Chicken Populations Exploiting Linkage Disequilibrium Information
Source: PubMed Central journal article supplement (PMC4494984; doi:10.1371/journal.pone.0130497), 2015-07-07
Supplement: pone.0130497.s017.pdf [file pone.0130497.s017.pdf]

Supplementary Table 15. Regions detected as putative selective sweeps by  $F_{ST}$  method (Gholami *et al* 2014) with upper (U) and lower (L) 1% threshold. LG stands for studies between commercial-layers and non-commercial chickens and BW stands for studies between brown and white layers, respectively.

| Chr | Start      | End        | $F_{ST}$ | Test |
|-----|------------|------------|----------|------|
| 1   | 1,193,561  | 2,160,406  | 0.04     | LG-L |
| 1   | 1,441,655  | 1,479,023  | 0.06     | BW-L |
| 1   | 5,179,370  | 6,229,653  | 0.05     | LG-L |
| 1   | 8,022,827  | 9,047,098  | 0.04     | LG-L |
| 1   | 8,421,962  | 8,845,934  | 0.05     | BW-L |
| 1   | 9,371,847  | 9,703,758  | 0.69     | BW-U |
| 1   | 9,398,724  | 9,688,938  | 0.26     | LG-U |
| 1   | 9,738,479  | 9,969,381  | 0.04     | LG-L |
| 1   | 9,859,154  | 9,881,817  | 0.08     | BW-L |
| 1   | 10,449,776 | 10,476,620 | 0.08     | BW-L |
| 1   | 10,716,550 | 10,841,257 | 0.05     | LG-L |
| 1   | 13,673,985 | 13,702,408 | 0.06     | LG-L |
| 1   | 14,050,347 | 14,084,859 | 0.06     | BW-L |
| 1   | 14,155,483 | 14,994,835 | 0.71     | BW-U |
| 1   | 14,161,900 | 14,194,912 | 0.22     | LG-U |
| 1   | 15,957,904 | 16,013,600 | 0.24     | LG-U |
| 1   | 16,775,514 | 17,072,787 | 0.05     | LG-L |
| 1   | 17,835,693 | 17,864,334 | 0.19     | LG-U |
| 1   | 17,978,421 | 18,020,939 | 0.05     | LG-L |
| 1   | 18,552,552 | 18,689,745 | 0.04     | LG-L |
| 1   | 18,560,115 | 18,683,424 | 0.05     | BW-L |
| 1   | 19,533,820 | 19,657,690 | 0.07     | BW-L |
| 1   | 19,679,055 | 19,708,643 | 0.06     | LG-L |
| 1   | 19,744,361 | 19,787,178 | 0.23     | LG-U |
| 1   | 21,515,856 | 21,669,265 | 0.05     | LG-L |
| 1   | 24,853,910 | 24,879,653 | 0.51     | BW-U |
| 1   | 25,442,648 | 26,636,946 | 0.75     | BW-U |
| 1   | 25,809,984 | 26,252,980 | 0.23     | LG-U |
| 1   | 27,414,647 | 27,444,302 | 0.07     | BW-L |
| 1   | 27,943,860 | 28,217,665 | 0.04     | LG-L |
| 1   | 28,186,828 | 28,308,289 | 0.02     | BW-L |
| 1   | 28,477,499 | 28,523,837 | 0.57     | BW-U |
| 1   | 29,182,974 | 29,221,914 | 0.21     | LG-U |
| 1   | 32,069,834 | 32,389,823 | 0.23     | LG-U |
| 1   | 32,075,632 | 32,103,663 | 0.53     | BW-U |
| 1   | 32,701,904 | 33,105,713 | 0.02     | BW-L |
| 1   | 32,721,392 | 32,962,939 | 0.04     | LG-L |

---

|   |            |            |      |      |
|---|------------|------------|------|------|
| 1 | 34,965,100 | 35,367,039 | 0.20 | LG-U |
| 1 | 35,898,597 | 35,946,312 | 0.61 | BW-U |
| 1 | 36,695,479 | 36,724,082 | 0.21 | LG-U |
| 1 | 37,303,787 | 37,333,726 | 0.55 | BW-U |
| 1 | 37,306,013 | 37,333,726 | 0.20 | LG-U |
| 1 | 38,323,846 | 38,445,567 | 0.55 | BW-U |
| 1 | 39,089,522 | 39,159,088 | 0.20 | LG-U |
| 1 | 39,091,445 | 39,109,935 | 0.54 | BW-U |
| 1 | 40,294,235 | 40,840,512 | 0.56 | BW-U |
| 1 | 41,340,808 | 41,508,154 | 0.21 | LG-U |
| 1 | 41,376,061 | 41,467,649 | 0.58 | BW-U |
| 1 | 41,637,416 | 41,687,234 | 0.05 | BW-L |
| 1 | 42,083,294 | 42,552,048 | 0.64 | BW-U |
| 1 | 43,122,131 | 43,561,291 | 0.64 | BW-U |
| 1 | 43,161,360 | 45,510,528 | 0.25 | LG-U |
| 1 | 43,368,113 | 43,419,637 | 0.05 | BW-L |
| 1 | 45,313,256 | 45,603,214 | 0.04 | BW-L |
| 1 | 46,322,686 | 46,546,913 | 0.26 | LG-U |
| 1 | 46,491,308 | 46,520,875 | 0.57 | BW-U |
| 1 | 46,608,479 | 46,648,538 | 0.08 | BW-L |
| 1 | 50,049,450 | 50,642,580 | 0.22 | LG-U |
| 1 | 50,111,749 | 50,153,489 | 0.58 | BW-U |
| 1 | 51,260,400 | 52,019,199 | 0.63 | BW-U |
| 1 | 51,747,030 | 52,016,343 | 0.21 | LG-U |
| 1 | 52,703,558 | 52,729,236 | 0.56 | BW-U |
| 1 | 53,066,372 | 53,080,103 | 0.06 | LG-L |
| 1 | 53,900,745 | 53,939,961 | 0.06 | BW-L |
| 1 | 54,246,372 | 54,273,416 | 0.54 | BW-U |
| 1 | 54,507,528 | 54,536,227 | 0.21 | LG-U |
| 1 | 55,764,654 | 55,804,334 | 0.20 | LG-U |
| 1 | 56,303,249 | 57,197,538 | 0.06 | BW-L |
| 1 | 56,527,871 | 56,556,097 | 0.05 | LG-L |
| 1 | 58,200,640 | 58,235,292 | 0.55 | BW-U |
| 1 | 58,363,617 | 58,956,853 | 0.21 | LG-U |
| 1 | 58,936,564 | 59,109,835 | 0.66 | BW-U |
| 1 | 59,873,363 | 59,888,158 | 0.19 | LG-U |
| 1 | 60,319,594 | 60,342,241 | 0.08 | BW-L |
| 1 | 60,359,702 | 60,480,934 | 0.53 | BW-U |
| 1 | 60,776,913 | 61,303,203 | 0.22 | LG-U |
| 1 | 61,152,158 | 61,195,236 | 0.69 | BW-U |
| 1 | 62,988,448 | 63,006,620 | 0.08 | BW-L |
| 1 | 63,029,709 | 63,443,749 | 0.20 | LG-U |
| 1 | 63,411,807 | 63,454,681 | 0.60 | BW-U |

---

|   |            |            |      |       |
|---|------------|------------|------|-------|
| 1 | 64,471,369 | 64,496,349 | 0.51 | BW-U  |
| 1 | 64,508,907 | 64,549,255 | 0.20 | LG-U  |
| 1 | 66,018,488 | 66,162,576 | 0.25 | LG-U  |
| 1 | 66,318,746 | 66,347,929 | 0.08 | BW-L  |
| 1 | 66,828,581 | 66,869,716 | 0.62 | BW-U  |
| 1 | 67,086,431 | 67,548,182 | 0.05 | LG-L  |
| 1 | 67,396,266 | 67,415,782 | 0.07 | BW-L  |
| 1 | 68,341,141 | 69,503,920 | 0.29 | LG-U  |
| 1 | 68,399,482 | 68,896,858 | 0.58 | BW-U  |
| 1 | 69,469,595 | 70,201,138 | 0.55 | BW-U  |
| 1 | 70,148,357 | 70,185,499 | 0.22 | LG-U  |
| 1 | 72,027,778 | 72,696,030 | 0.03 | BW-L  |
| 1 | 72,619,478 | 73,142,186 | 0.22 | LG-U  |
| 1 | 72,896,754 | 73,167,112 | 0.74 | BW-U  |
| 1 | 76,226,444 | 76,792,359 | 0.23 | LG-U  |
| 1 | 76,421,837 | 76,526,547 | 0.03 | BW-L  |
| 1 | 79,066,419 | 79,092,157 | 0.20 | LG-U  |
| 1 | 79,987,700 | 80,418,301 | 0.04 | BW-L  |
| 1 | 81,260,697 | 81,731,439 | 0.04 | LG-L  |
| 1 | 81,686,042 | 82,069,734 | 0.03 | BW-L  |
| 1 | 84,323,244 | 86,151,250 | 0.22 | LG-U  |
| 1 | 84,642,378 | 85,796,928 | 0.64 | BW-U  |
| 1 | 86,464,220 | 86,488,605 | 0.05 | LG-L  |
| 1 | 86,818,724 | 86,856,240 | 0.06 | BW-L  |
| 1 | 87,642,571 | 88,092,210 | 0.04 | LG-L  |
| 1 | 87,813,146 | 87,880,457 | 0.57 | BW-U  |
| 1 | 88,722,419 | 88,768,126 | 0.04 | BW-L  |
| 1 | 88,748,151 | 89,093,543 | 0.05 | LG-L  |
| 1 | 89,966,169 | 89,990,508 | 0.06 | BW-L  |
| 1 | 90,748,828 | 91,197,147 | 0.07 | BW-L  |
| 1 | 90,886,679 | 91,164,114 | 0.05 | LG-L  |
| 1 | 91,379,104 | 91,434,231 | 0.21 | LG-U  |
| 1 | 91,381,218 | 91,415,282 | 0.55 | BW-U  |
| 1 | 91,753,916 | 91,907,871 | 0.05 | LG-L  |
| 1 | 91,761,220 | 91,794,078 | 0.06 | BW-L  |
| 1 | 92,814,600 | 92,886,450 | 0.05 | LG-L  |
| 1 | 93,001,292 | 93,029,051 | 0.52 | BW-U, |
| 1 | 93,823,292 | 96,765,628 | 0.03 | LG-L  |
| 1 | 94,153,506 | 94,193,322 | 0.06 | BW-L  |
| 1 | 94,360,597 | 94,432,393 | 0.82 | BW-U  |
| 1 | 94,373,088 | 94,417,220 | 0.23 | LG-U  |
| 1 | 95,291,969 | 95,367,844 | 0.07 | BW-L  |
| 1 | 96,668,297 | 96,707,218 | 0.07 | BW-L  |

---

|   |             |             |      |            |
|---|-------------|-------------|------|------------|
| 1 | 97,602,431  | 99,084,382  | 0.03 | LG-L       |
| 1 | 98,232,148  | 98,276,678  | 0.21 | LG-U       |
| 1 | 98,284,551  | 98,820,373  | 0.03 | BW-L       |
| 1 | 99,795,712  | 99,838,296  | 0.22 | LG-U       |
| 1 | 99,807,511  | 100,221,026 | 0.59 | BW-U       |
| 1 | 101,036,229 | 101,487,219 | 0.05 | LG-L       |
| 1 | 101,444,303 | 101,563,985 | 0.07 | BW-L       |
| 1 | 102,787,132 | 102,812,382 | 0.21 | LG-U       |
| 1 | 102,991,881 | 103,017,289 | 0.51 | BW-U       |
| 1 | 103,156,470 | 103,593,845 | 0.05 | LG-L       |
| 1 | 104,312,359 | 104,538,878 | 0.03 | LG-L       |
| 1 | 104,511,693 | 104,533,175 | 0.07 | BW-L       |
| 1 | 106,034,326 | 106,052,643 | 0.06 | LG-L       |
| 1 | 106,100,891 | 106,153,189 | 0.04 | BW-L       |
| 1 | 107,776,597 | 108,136,657 | 0.23 | LG-U, BW-U |
| 1 | 108,636,886 | 108,959,832 | 0.21 | LG-U       |
| 1 | 111,267,609 | 111,288,872 | 0.08 | BW-L       |
| 1 | 111,267,609 | 111,527,698 | 0.05 | LG-L       |
| 1 | 112,156,503 | 112,181,114 | 0.08 | BW-L, LG-L |
| 1 | 113,107,191 | 113,529,870 | 0.05 | LG-L       |
| 1 | 113,809,905 | 113,828,375 | 0.20 | LG-U       |
| 1 | 114,894,595 | 114,915,628 | 0.51 | BW-U       |
| 1 | 115,476,285 | 115,523,891 | 0.21 | LG-U       |
| 1 | 115,988,784 | 116,004,314 | 0.54 | BW-U       |
| 1 | 116,503,940 | 117,648,686 | 0.28 | LG-U       |
| 1 | 117,296,836 | 117,651,049 | 0.67 | BW-U       |
| 1 | 117,438,382 | 117,462,220 | 0.05 | LG-L       |
| 1 | 117,491,774 | 117,551,343 | 0.04 | BW-L       |
| 1 | 119,028,106 | 120,145,853 | 0.04 | BW-L       |
| 1 | 119,432,048 | 119,450,552 | 0.51 | BW-U       |
| 1 | 119,608,449 | 119,635,306 | 0.05 | LG-L       |
| 1 | 119,939,464 | 120,008,424 | 0.31 | LG-U       |
| 1 | 122,501,717 | 122,537,196 | 0.21 | LG-U       |
| 1 | 123,601,626 | 123,644,932 | 0.63 | BW-U       |
| 1 | 124,259,017 | 124,342,556 | 0.58 | BW-U       |
| 1 | 124,270,116 | 124,288,848 | 0.20 | LG-U       |
| 1 | 124,824,287 | 124,845,348 | 0.08 | BW-L       |
| 1 | 125,487,006 | 125,938,728 | 0.06 | LG-L       |
| 1 | 126,449,811 | 128,670,033 | 0.04 | LG-L       |
| 1 | 126,618,698 | 126,654,297 | 0.54 | BW-U       |
| 1 | 127,236,038 | 127,748,123 | 0.03 | BW-L       |
| 1 | 128,325,849 | 128,345,605 | 0.08 | BW-L       |
| 1 | 130,191,226 | 131,019,604 | 0.21 | LG-U       |

---

|   |             |             |      |      |
|---|-------------|-------------|------|------|
| 1 | 130,497,173 | 130,512,806 | 0.08 | BW-L |
| 1 | 132,033,893 | 132,065,465 | 0.07 | BW-L |
| 1 | 132,035,631 | 132,404,557 | 0.05 | LG-L |
| 1 | 133,744,269 | 133,893,092 | 0.21 | LG-U |
| 1 | 135,071,418 | 135,095,827 | 0.57 | BW-U |
| 1 | 135,642,106 | 135,662,576 | 0.08 | BW-L |
| 1 | 136,405,896 | 136,460,075 | 0.26 | LG-U |
| 1 | 138,047,390 | 138,064,281 | 0.06 | LG-L |
| 1 | 138,915,404 | 139,157,741 | 0.04 | LG-L |
| 1 | 139,633,324 | 139,653,373 | 0.21 | LG-U |
| 1 | 140,802,417 | 140,879,180 | 0.66 | BW-U |
| 1 | 140,838,046 | 141,243,417 | 0.24 | LG-U |
| 1 | 142,056,888 | 142,115,098 | 0.04 | LG-L |
| 1 | 142,067,867 | 142,099,589 | 0.08 | BW-L |
| 1 | 143,202,830 | 143,223,922 | 0.06 | LG-L |
| 1 | 143,665,916 | 143,697,509 | 0.54 | BW-U |
| 1 | 143,783,915 | 143,806,883 | 0.08 | BW-L |
| 1 | 143,935,535 | 143,966,940 | 0.22 | LG-U |
| 1 | 144,529,094 | 144,554,294 | 0.58 | BW-U |
| 1 | 144,533,253 | 144,554,294 | 0.20 | LG-U |
| 1 | 145,124,081 | 145,140,078 | 0.51 | BW-U |
| 1 | 145,379,101 | 145,529,509 | 0.23 | LG-U |
| 1 | 146,956,898 | 147,263,307 | 0.66 | BW-U |
| 1 | 146,996,868 | 147,029,999 | 0.20 | LG-U |
| 1 | 147,981,974 | 148,661,701 | 0.82 | BW-U |
| 1 | 148,499,786 | 148,651,466 | 0.26 | LG-U |
| 1 | 148,833,787 | 148,921,664 | 0.04 | LG-L |
| 1 | 148,833,787 | 149,016,095 | 0.00 | BW-L |
| 1 | 149,726,669 | 152,521,639 | 0.93 | BW-U |
| 1 | 150,244,477 | 150,720,557 | 0.24 | LG-U |
| 1 | 150,470,729 | 150,657,508 | 0.01 | BW-L |
| 1 | 151,297,152 | 151,425,445 | 0.07 | BW-L |
| 1 | 151,426,019 | 152,178,438 | 0.27 | LG-U |
| 1 | 152,078,774 | 152,102,965 | 0.04 | BW-L |
| 1 | 154,200,791 | 155,038,303 | 0.54 | BW-U |
| 1 | 155,379,431 | 155,409,680 | 0.20 | LG-U |
| 1 | 156,506,544 | 156,555,944 | 0.62 | BW-U |
| 1 | 156,721,032 | 157,385,675 | 0.05 | LG-L |
| 1 | 158,621,198 | 158,828,625 | 0.05 | LG-L |
| 1 | 159,121,548 | 159,263,728 | 0.24 | LG-U |
| 1 | 159,121,630 | 159,263,621 | 0.57 | BW-U |
| 1 | 159,438,530 | 159,642,844 | 0.05 | LG-L |
| 1 | 160,207,996 | 160,785,436 | 0.22 | LG-U |

---

|   |             |             |      |      |
|---|-------------|-------------|------|------|
| 1 | 160,244,586 | 160,287,743 | 0.07 | BW-L |
| 1 | 160,508,332 | 160,797,848 | 0.66 | BW-U |
| 1 | 161,064,433 | 161,288,744 | 0.05 | LG-L |
| 1 | 161,373,573 | 161,535,064 | 0.05 | BW-L |
| 1 | 161,546,520 | 161,673,467 | 0.23 | LG-U |
| 1 | 161,804,134 | 161,970,556 | 0.62 | BW-U |
| 1 | 162,478,305 | 163,030,434 | 0.05 | LG-L |
| 1 | 162,836,386 | 163,076,017 | 0.04 | BW-L |
| 1 | 162,878,131 | 163,491,021 | 0.22 | LG-U |
| 1 | 163,588,943 | 163,611,545 | 0.08 | BW-L |
| 1 | 163,703,238 | 163,731,497 | 0.52 | BW-U |
| 1 | 164,366,196 | 164,570,010 | 0.63 | BW-U |
| 1 | 164,526,277 | 164,557,150 | 0.22 | LG-U |
| 1 | 164,721,098 | 164,770,827 | 0.06 | BW-L |
| 1 | 164,735,397 | 164,770,827 | 0.05 | LG-L |
| 1 | 165,063,784 | 165,660,760 | 0.26 | LG-U |
| 1 | 165,303,792 | 165,596,484 | 0.68 | BW-U |
| 1 | 167,086,957 | 168,498,566 | 0.60 | BW-U |
| 1 | 167,555,085 | 168,480,857 | 0.21 | LG-U |
| 1 | 169,331,679 | 169,732,397 | 0.07 | BW-L |
| 1 | 169,382,563 | 169,419,583 | 0.03 | LG-L |
| 1 | 170,343,216 | 170,372,561 | 0.20 | LG-U |
| 1 | 170,359,901 | 170,372,561 | 0.51 | BW-U |
| 1 | 170,915,076 | 170,968,352 | 0.06 | BW-L |
| 1 | 171,872,899 | 171,893,375 | 0.06 | LG-L |
| 1 | 172,024,534 | 172,046,034 | 0.55 | BW-U |
| 1 | 173,597,516 | 173,941,361 | 0.24 | LG-U |
| 1 | 174,729,918 | 174,915,512 | 0.55 | BW-U |
| 1 | 174,932,994 | 174,956,295 | 0.07 | BW-L |
| 1 | 174,937,236 | 174,968,586 | 0.05 | LG-L |
| 1 | 175,903,675 | 176,089,183 | 0.57 | BW-U |
| 1 | 176,834,618 | 177,693,121 | 0.23 | LG-U |
| 1 | 176,837,169 | 177,693,121 | 0.58 | BW-U |
| 1 | 178,327,931 | 178,734,654 | 0.22 | LG-U |
| 1 | 179,551,353 | 179,640,872 | 0.21 | LG-U |
| 1 | 179,681,285 | 179,752,003 | 0.52 | BW-U |
| 1 | 182,261,557 | 182,278,402 | 0.20 | LG-U |
| 1 | 182,832,567 | 182,880,949 | 0.04 | LG-L |
| 1 | 182,853,376 | 182,876,578 | 0.06 | BW-L |
| 1 | 183,519,042 | 183,534,830 | 0.52 | BW-U |
| 1 | 183,529,755 | 183,698,841 | 0.22 | LG-U |
| 1 | 184,467,724 | 184,626,315 | 0.23 | LG-U |
| 1 | 185,196,591 | 185,241,578 | 0.26 | LG-U |

---

|   |             |             |      |      |
|---|-------------|-------------|------|------|
| 1 | 185,196,591 | 185,416,841 | 0.74 | BW-U |
| 1 | 186,949,522 | 186,963,105 | 0.06 | LG-L |
| 1 | 188,269,246 | 188,284,541 | 0.51 | BW-U |
| 1 | 188,663,729 | 188,756,359 | 0.04 | LG-L |
| 1 | 190,666,686 | 191,173,971 | 0.24 | LG-U |
| 1 | 190,714,558 | 190,747,189 | 0.05 | BW-L |
| 1 | 191,637,275 | 191,975,267 | 0.71 | BW-U |
| 1 | 191,953,611 | 191,966,120 | 0.20 | LG-U |
| 1 | 192,490,938 | 192,887,414 | 0.59 | BW-U |
| 1 | 193,339,654 | 193,359,674 | 0.20 | LG-U |
| 1 | 193,645,473 | 193,665,557 | 0.52 | BW-U |
| 1 | 193,939,943 | 193,960,555 | 0.07 | BW-L |
| 1 | 194,211,322 | 194,227,126 | 0.20 | LG-U |
| 2 | 1,254,719   | 1,276,409   | 0.06 | LG-L |
| 2 | 3,711,786   | 3,741,245   | 0.05 | LG-L |
| 2 | 4,716,998   | 4,740,715   | 0.06 | LG-L |
| 2 | 5,410,332   | 5,444,821   | 0.56 | BW-U |
| 2 | 6,442,214   | 6,477,449   | 0.05 | LG-L |
| 2 | 7,523,577   | 7,551,619   | 0.05 | LG-L |
| 2 | 8,724,225   | 8,747,572   | 0.20 | LG-U |
| 2 | 8,909,787   | 8,932,064   | 0.06 | LG-L |
| 2 | 11,992,949  | 12,514,619  | 0.03 | LG-L |
| 2 | 12,108,802  | 12,249,637  | 0.02 | BW-L |
| 2 | 13,320,934  | 13,987,558  | 0.23 | LG-U |
| 2 | 13,754,019  | 14,009,494  | 0.60 | BW-U |
| 2 | 14,607,509  | 14,976,241  | 0.21 | LG-U |
| 2 | 14,666,030  | 14,712,311  | 0.60 | BW-U |
| 2 | 15,478,956  | 15,516,089  | 0.20 | LG-U |
| 2 | 18,715,224  | 18,739,474  | 0.56 | BW-U |
| 2 | 18,935,659  | 20,006,860  | 0.26 | LG-U |
| 2 | 19,971,618  | 20,016,589  | 0.58 | BW-U |
| 2 | 21,521,930  | 21,716,202  | 0.53 | BW-U |
| 2 | 21,546,414  | 21,655,717  | 0.06 | LG-L |
| 2 | 22,478,520  | 22,496,660  | 0.06 | LG-L |
| 2 | 24,158,283  | 24,465,030  | 0.52 | BW-U |
| 2 | 26,087,115  | 26,490,314  | 0.25 | LG-U |
| 2 | 27,604,583  | 27,639,070  | 0.05 | LG-L |
| 2 | 27,609,876  | 27,630,160  | 0.08 | BW-L |
| 2 | 29,710,072  | 29,732,270  | 0.51 | BW-U |
| 2 | 30,259,123  | 30,317,199  | 0.05 | LG-L |
| 2 | 30,278,951  | 30,329,517  | 0.06 | BW-L |
| 2 | 30,602,381  | 30,636,767  | 0.53 | BW-U |
| 2 | 31,288,760  | 31,313,579  | 0.20 | LG-U |

---

|   |            |            |      |      |
|---|------------|------------|------|------|
| 2 | 31,621,119 | 31,638,763 | 0.06 | LG-L |
| 2 | 31,805,792 | 31,829,568 | 0.07 | BW-L |
| 2 | 32,442,546 | 32,478,619 | 0.20 | LG-U |
| 2 | 33,670,257 | 33,698,142 | 0.06 | LG-L |
| 2 | 34,041,705 | 34,081,309 | 0.06 | BW-L |
| 2 | 34,840,663 | 34,880,005 | 0.05 | LG-L |
| 2 | 36,867,618 | 36,900,900 | 0.06 | LG-L |
| 2 | 37,503,545 | 37,541,400 | 0.23 | LG-U |
| 2 | 38,768,253 | 38,805,734 | 0.05 | LG-L |
| 2 | 41,023,868 | 41,360,951 | 0.25 | LG-U |
| 2 | 43,957,154 | 43,997,435 | 0.06 | BW-L |
| 2 | 45,285,004 | 45,339,358 | 0.21 | LG-U |
| 2 | 45,299,810 | 45,697,314 | 0.54 | BW-U |
| 2 | 46,209,647 | 46,257,723 | 0.22 | LG-U |
| 2 | 46,665,504 | 46,701,610 | 0.56 | BW-U |
| 2 | 48,300,308 | 48,356,680 | 0.59 | BW-U |
| 2 | 50,069,573 | 50,249,428 | 0.04 | LG-L |
| 2 | 50,454,845 | 50,793,336 | 0.75 | BW-U |
| 2 | 50,509,204 | 50,612,925 | 0.21 | LG-U |
| 2 | 56,601,004 | 56,900,904 | 0.05 | LG-L |
| 2 | 56,870,413 | 56,899,952 | 0.07 | BW-L |
| 2 | 57,851,345 | 57,919,930 | 0.63 | BW-U |
| 2 | 60,282,670 | 60,315,907 | 0.07 | BW-L |
| 2 | 60,448,058 | 60,477,058 | 0.06 | LG-L |
| 2 | 62,219,445 | 62,250,695 | 0.06 | BW-L |
| 2 | 62,610,833 | 62,637,583 | 0.53 | BW-U |
| 2 | 64,002,393 | 64,061,503 | 0.05 | LG-L |
| 2 | 66,443,035 | 66,471,338 | 0.51 | BW-U |
| 2 | 66,579,950 | 66,618,759 | 0.20 | LG-U |
| 2 | 67,525,380 | 67,813,699 | 0.54 | BW-U |
| 2 | 67,874,326 | 67,904,798 | 0.19 | LG-U |
| 2 | 69,167,813 | 69,200,233 | 0.06 | LG-L |
| 2 | 69,985,562 | 70,028,537 | 0.51 | BW-U |
| 2 | 71,422,416 | 71,470,960 | 0.21 | LG-U |
| 2 | 72,367,663 | 72,821,517 | 0.25 | LG-U |
| 2 | 72,465,649 | 72,518,498 | 0.03 | BW-L |
| 2 | 72,466,233 | 72,523,991 | 0.03 | LG-L |
| 2 | 73,170,359 | 73,767,252 | 0.06 | BW-L |
| 2 | 73,177,164 | 73,982,655 | 0.04 | LG-L |
| 2 | 74,247,580 | 74,463,169 | 0.63 | BW-U |
| 2 | 75,822,569 | 75,846,801 | 0.51 | BW-U |
| 2 | 76,386,098 | 76,401,938 | 0.52 | BW-U |
| 2 | 78,017,562 | 78,047,660 | 0.05 | LG-L |

---



|   |             |             |      |      |
|---|-------------|-------------|------|------|
| 2 | 78,018,173  | 78,047,660  | 0.07 | BW-L |
| 2 | 78,308,220  | 78,539,035  | 0.61 | BW-U |
| 2 | 79,085,768  | 79,464,425  | 0.32 | LG-U |
| 2 | 79,120,897  | 79,150,192  | 0.07 | BW-L |
| 2 | 79,418,972  | 79,461,926  | 0.54 | BW-U |
| 2 | 80,471,939  | 80,722,131  | 0.63 | BW-U |
| 2 | 81,114,910  | 81,313,704  | 0.22 | LG-U |
| 2 | 81,356,139  | 81,564,456  | 0.59 | BW-U |
| 2 | 81,580,114  | 81,977,415  | 0.03 | BW-L |
| 2 | 81,586,109  | 82,057,139  | 0.04 | LG-L |
| 2 | 82,750,853  | 83,307,881  | 0.57 | BW-U |
| 2 | 82,750,853  | 83,477,791  | 0.23 | LG-U |
| 2 | 84,311,596  | 85,079,253  | 0.70 | BW-U |
| 2 | 84,611,314  | 84,644,824  | 0.21 | LG-U |
| 2 | 85,931,314  | 86,583,670  | 0.77 | BW-U |
| 2 | 86,158,318  | 86,703,786  | 0.25 | LG-U |
| 2 | 87,519,967  | 87,736,417  | 0.58 | BW-U |
| 2 | 88,472,359  | 88,579,747  | 0.22 | LG-U |
| 2 | 88,782,897  | 88,805,513  | 0.07 | BW-L |
| 2 | 89,500,095  | 89,570,026  | 0.26 | LG-U |
| 2 | 90,766,561  | 90,898,916  | 0.24 | LG-U |
| 2 | 90,839,128  | 91,342,577  | 0.05 | BW-L |
| 2 | 91,370,665  | 91,387,775  | 0.53 | BW-U |
| 2 | 92,273,841  | 92,601,350  | 0.05 | LG-L |
| 2 | 92,287,279  | 92,481,014  | 0.06 | BW-L |
| 2 | 93,682,562  | 94,402,094  | 0.05 | BW-L |
| 2 | 95,529,261  | 95,562,224  | 0.08 | BW-L |
| 2 | 95,887,405  | 95,915,287  | 0.20 | LG-U |
| 2 | 96,072,344  | 96,091,899  | 0.07 | BW-L |
| 2 | 96,575,182  | 96,612,566  | 0.54 | BW-U |
| 2 | 97,135,288  | 97,163,857  | 0.55 | BW-U |
| 2 | 97,753,982  | 97,778,921  | 0.07 | BW-L |
| 2 | 98,542,158  | 98,561,499  | 0.06 | LG-L |
| 2 | 102,665,193 | 103,192,592 | 0.56 | BW-U |
| 2 | 102,683,568 | 102,725,495 | 0.22 | LG-U |
| 2 | 103,213,369 | 103,232,528 | 0.06 | BW-L |
| 2 | 104,577,404 | 105,101,612 | 0.04 | LG-L |
| 2 | 104,832,305 | 104,851,062 | 0.08 | BW-L |
| 2 | 106,233,586 | 106,271,908 | 0.05 | LG-L |
| 2 | 107,830,556 | 107,866,167 | 0.03 | BW-L |
| 2 | 107,851,085 | 107,868,688 | 0.06 | LG-L |
| 2 | 107,951,402 | 108,324,721 | 0.55 | BW-U |
| 2 | 108,122,366 | 108,145,782 | 0.21 | LG-U |

---

|   |             |             |      |      |
|---|-------------|-------------|------|------|
| 2 | 109,901,344 | 109,961,290 | 0.22 | LG-U |
| 2 | 109,902,343 | 110,067,338 | 0.61 | BW-U |
| 2 | 110,287,910 | 110,314,410 | 0.06 | LG-L |
| 2 | 110,792,545 | 111,127,249 | 0.05 | BW-L |
| 2 | 110,874,286 | 110,898,112 | 0.53 | BW-U |
| 2 | 111,779,831 | 112,711,412 | 0.04 | LG-L |
| 2 | 111,780,792 | 111,810,338 | 0.08 | BW-L |
| 2 | 112,626,661 | 113,774,085 | 0.05 | BW-L |
| 2 | 113,517,867 | 114,461,273 | 0.05 | LG-L |
| 2 | 114,319,853 | 114,341,565 | 0.07 | BW-L |
| 2 | 117,335,609 | 117,356,505 | 0.52 | BW-U |
| 2 | 117,336,110 | 117,356,505 | 0.20 | LG-U |
| 2 | 117,908,284 | 118,064,259 | 0.05 | LG-L |
| 2 | 119,121,036 | 119,294,819 | 0.05 | LG-L |
| 2 | 119,121,036 | 119,780,209 | 0.05 | BW-L |
| 2 | 121,448,317 | 122,041,521 | 0.05 | BW-L |
| 2 | 121,594,944 | 121,619,256 | 0.55 | BW-U |
| 2 | 121,703,341 | 122,013,676 | 0.04 | LG-L |
| 2 | 122,369,947 | 122,408,083 | 0.58 | BW-U |
| 2 | 122,976,602 | 122,998,281 | 0.20 | LG-U |
| 2 | 122,976,602 | 123,250,117 | 0.61 | BW-U |
| 2 | 123,556,204 | 123,595,552 | 0.20 | LG-U |
| 2 | 123,710,819 | 123,731,509 | 0.05 | LG-L |
| 2 | 124,070,145 | 124,340,500 | 0.53 | BW-U |
| 2 | 125,285,159 | 125,320,460 | 0.59 | BW-U |
| 2 | 125,844,447 | 126,114,969 | 0.06 | BW-L |
| 2 | 126,678,367 | 126,737,768 | 0.06 | LG-L |
| 2 | 127,154,944 | 127,175,399 | 0.52 | BW-U |
| 2 | 127,528,038 | 127,559,402 | 0.05 | LG-L |
| 2 | 128,050,732 | 128,076,199 | 0.54 | BW-U |
| 2 | 128,624,861 | 128,657,714 | 0.05 | LG-L |
| 2 | 128,741,868 | 128,910,160 | 0.04 | BW-L |
| 2 | 129,617,573 | 129,958,082 | 0.23 | LG-U |
| 2 | 129,992,294 | 130,174,198 | 0.05 | BW-L |
| 2 | 130,764,762 | 132,364,324 | 0.04 | BW-L |
| 2 | 131,107,254 | 133,523,335 | 0.03 | LG-L |
| 2 | 131,256,281 | 131,275,561 | 0.20 | LG-U |
| 2 | 133,356,866 | 133,465,145 | 0.07 | BW-L |
| 2 | 135,496,322 | 136,214,962 | 0.21 | LG-U |
| 2 | 136,917,214 | 136,966,955 | 0.58 | BW-U |
| 2 | 136,917,214 | 136,970,865 | 0.22 | LG-U |
| 2 | 138,469,076 | 138,494,620 | 0.53 | BW-U |
| 2 | 139,375,063 | 139,405,258 | 0.05 | LG-L |

---

|   |             |             |      |      |
|---|-------------|-------------|------|------|
| 2 | 140,269,082 | 140,769,481 | 0.01 | BW-L |
| 2 | 140,271,526 | 141,083,414 | 0.03 | LG-L |
| 2 | 142,669,542 | 142,731,742 | 0.04 | BW-L |
| 2 | 143,476,382 | 143,496,648 | 0.51 | BW-U |
| 2 | 144,327,359 | 144,374,999 | 0.05 | LG-L |
| 2 | 145,588,698 | 146,300,633 | 0.01 | BW-L |
| 2 | 145,826,510 | 145,882,701 | 0.66 | BW-U |
| 2 | 145,987,205 | 146,319,664 | 0.03 | LG-L |
| 2 | 146,470,566 | 146,490,399 | 0.20 | LG-U |
| 2 | 146,949,180 | 146,970,068 | 0.53 | BW-U |
| 3 | 320,263     | 408,990     | 0.05 | LG-L |
| 3 | 1,419,336   | 1,479,746   | 0.06 | BW-L |
| 3 | 1,767,560   | 1,793,471   | 0.06 | LG-L |
| 3 | 4,633,728   | 4,658,160   | 0.20 | LG-U |
| 3 | 5,773,758   | 6,061,872   | 0.27 | LG-U |
| 3 | 6,167,726   | 7,269,029   | 0.02 | BW-L |
| 3 | 6,431,257   | 6,690,595   | 0.04 | LG-L |
| 3 | 6,628,883   | 7,276,820   | 0.26 | LG-U |
| 3 | 8,281,426   | 8,306,342   | 0.52 | BW-U |
| 3 | 9,506,957   | 9,542,304   | 0.56 | BW-U |
| 3 | 9,511,413   | 9,543,859   | 0.20 | LG-U |
| 3 | 9,688,855   | 9,705,889   | 0.06 | LG-L |
| 3 | 10,282,400  | 11,786,261  | 0.04 | LG-L |
| 3 | 10,629,503  | 11,229,324  | 0.06 | BW-L |
| 3 | 12,152,722  | 12,196,380  | 0.08 | BW-L |
| 3 | 12,276,499  | 12,705,631  | 0.58 | BW-U |
| 3 | 12,376,900  | 12,735,712  | 0.20 | LG-U |
| 3 | 12,847,344  | 13,285,255  | 0.07 | BW-L |
| 3 | 13,356,427  | 13,467,255  | 0.63 | BW-U |
| 3 | 13,806,554  | 13,827,135  | 0.08 | BW-L |
| 3 | 14,698,048  | 14,735,257  | 0.22 | LG-U |
| 3 | 16,494,431  | 16,527,235  | 0.05 | BW-L |
| 3 | 18,502,320  | 18,555,412  | 0.05 | LG-L |
| 3 | 19,372,889  | 19,410,526  | 0.07 | BW-L |
| 3 | 20,124,055  | 20,336,700  | 0.05 | BW-L |
| 3 | 20,378,393  | 20,530,346  | 0.24 | LG-U |
| 3 | 20,418,372  | 20,615,278  | 0.58 | BW-U |
| 3 | 21,501,813  | 21,705,493  | 0.25 | LG-U |
| 3 | 21,596,816  | 22,095,628  | 0.07 | BW-L |
| 3 | 21,665,666  | 21,707,951  | 0.58 | BW-U |
| 3 | 22,000,709  | 22,098,744  | 0.06 | LG-L |
| 3 | 22,598,789  | 22,950,067  | 0.05 | BW-L |
| 3 | 22,890,062  | 23,044,823  | 0.05 | LG-L |

---

|   |            |            |      |      |
|---|------------|------------|------|------|
| 3 | 23,794,815 | 23,846,394 | 0.03 | BW-L |
| 3 | 24,829,946 | 24,852,498 | 0.07 | BW-L |
| 3 | 26,271,660 | 26,845,328 | 0.23 | LG-U |
| 3 | 26,362,754 | 26,410,608 | 0.02 | BW-L |
| 3 | 27,772,603 | 29,609,673 | 0.72 | BW-U |
| 3 | 27,920,939 | 28,849,114 | 0.27 | LG-U |
| 3 | 28,399,719 | 28,596,692 | 0.02 | BW-L |
| 3 | 29,491,809 | 29,660,397 | 0.21 | LG-U |
| 3 | 31,713,919 | 31,757,322 | 0.04 | LG-L |
| 3 | 31,720,264 | 31,792,913 | 0.07 | BW-L |
| 3 | 32,613,450 | 32,682,843 | 0.56 | BW-U |
| 3 | 32,655,959 | 32,682,843 | 0.20 | LG-U |
| 3 | 33,348,669 | 34,913,481 | 0.03 | BW-L |
| 3 | 34,196,557 | 34,585,808 | 0.20 | LG-U |
| 3 | 36,125,173 | 36,244,850 | 0.52 | BW-U |
| 3 | 36,543,375 | 36,595,659 | 0.05 | LG-L |
| 3 | 36,543,375 | 36,627,502 | 0.05 | BW-L |
| 3 | 36,629,200 | 36,823,879 | 0.21 | LG-U |
| 3 | 37,155,460 | 37,199,596 | 0.06 | BW-L |
| 3 | 38,009,595 | 38,054,389 | 0.61 | BW-U |
| 3 | 38,031,719 | 38,054,389 | 0.20 | LG-U |
| 3 | 41,032,855 | 43,152,536 | 0.67 | BW-U |
| 3 | 41,445,965 | 43,089,377 | 0.27 | LG-U |
| 3 | 43,343,364 | 43,364,668 | 0.07 | BW-L |
| 3 | 44,029,977 | 47,579,337 | 0.75 | BW-U |
| 3 | 44,186,023 | 44,204,943 | 0.20 | LG-U |
| 3 | 45,473,042 | 46,772,410 | 0.22 | LG-U |
| 3 | 45,643,050 | 46,171,577 | 0.06 | BW-L |
| 3 | 47,418,567 | 47,465,221 | 0.22 | LG-U |
| 3 | 48,295,962 | 48,969,283 | 0.76 | BW-U |
| 3 | 48,302,524 | 48,931,846 | 0.22 | LG-U |
| 3 | 48,532,979 | 49,351,750 | 0.06 | BW-L |
| 3 | 48,601,630 | 48,849,147 | 0.06 | LG-L |
| 3 | 49,956,133 | 50,716,516 | 0.73 | BW-U |
| 3 | 50,678,529 | 50,848,504 | 0.24 | LG-U |
| 3 | 50,701,546 | 50,785,517 | 0.02 | BW-L |
| 3 | 51,774,255 | 52,054,611 | 0.63 | BW-U |
| 3 | 52,424,633 | 52,932,282 | 0.04 | LG-L |
| 3 | 53,143,832 | 53,180,537 | 0.06 | BW-L |
| 3 | 53,224,543 | 53,253,795 | 0.51 | BW-U |
| 3 | 54,466,648 | 54,488,554 | 0.55 | BW-U |
| 3 | 54,577,913 | 55,003,855 | 0.05 | LG-L |
| 3 | 55,088,887 | 55,141,005 | 0.58 | BW-U |

---

|   |            |            |      |      |
|---|------------|------------|------|------|
| 3 | 55,904,835 | 55,938,261 | 0.05 | LG-L |
| 3 | 58,034,427 | 58,066,089 | 0.53 | BW-U |
| 3 | 58,613,792 | 58,637,720 | 0.06 | LG-L |
| 3 | 59,122,973 | 59,146,974 | 0.59 | BW-U |
| 3 | 59,202,622 | 59,231,427 | 0.07 | BW-L |
| 3 | 60,356,031 | 61,197,748 | 0.04 | LG-L |
| 3 | 60,944,428 | 61,132,698 | 0.03 | BW-L |
| 3 | 61,837,810 | 61,851,374 | 0.06 | LG-L |
| 3 | 63,228,866 | 64,770,658 | 0.67 | BW-U |
| 3 | 64,499,044 | 64,519,068 | 0.08 | BW-L |
| 3 | 65,044,935 | 65,076,224 | 0.05 | LG-L |
| 3 | 65,366,745 | 66,340,427 | 0.58 | BW-U |
| 3 | 67,753,710 | 67,782,451 | 0.57 | BW-U |
| 3 | 67,882,844 | 67,905,960 | 0.06 | LG-L |
| 3 | 68,620,899 | 68,658,164 | 0.08 | BW-L |
| 3 | 69,297,198 | 69,336,178 | 0.05 | LG-L |
| 3 | 69,945,584 | 69,986,940 | 0.67 | BW-U |
| 3 | 71,133,624 | 71,247,607 | 0.07 | BW-L |
| 3 | 72,265,806 | 72,288,043 | 0.07 | BW-L |
| 3 | 72,574,767 | 72,680,359 | 0.04 | LG-L |
| 3 | 73,115,920 | 73,569,141 | 0.24 | LG-U |
| 3 | 73,119,566 | 74,312,534 | 0.67 | BW-U |
| 3 | 73,260,405 | 73,292,590 | 0.04 | LG-L |
| 3 | 75,815,930 | 75,895,205 | 0.20 | LG-U |
| 3 | 76,027,460 | 76,063,825 | 0.07 | BW-L |
| 3 | 76,395,628 | 76,415,945 | 0.52 | BW-U |
| 3 | 76,802,258 | 76,827,026 | 0.20 | LG-U |
| 3 | 77,178,927 | 78,495,024 | 0.05 | BW-L |
| 3 | 77,799,255 | 77,832,231 | 0.21 | LG-U |
| 3 | 78,333,886 | 78,357,498 | 0.22 | LG-U |
| 3 | 79,115,925 | 79,151,303 | 0.55 | BW-U |
| 3 | 79,248,829 | 79,275,469 | 0.20 | LG-U |
| 3 | 79,685,980 | 79,713,858 | 0.06 | BW-L |
| 3 | 79,792,211 | 80,815,179 | 0.67 | BW-U |
| 3 | 79,973,088 | 80,502,888 | 0.21 | LG-U |
| 3 | 80,912,375 | 80,965,592 | 0.07 | BW-L |
| 3 | 80,919,014 | 80,943,200 | 0.05 | LG-L |
| 3 | 81,500,811 | 81,773,761 | 0.58 | BW-U |
| 3 | 81,558,990 | 81,587,532 | 0.19 | LG-U |
| 3 | 81,708,092 | 81,744,267 | 0.05 | LG-L |
| 3 | 82,103,968 | 82,134,246 | 0.07 | BW-L |
| 3 | 82,984,757 | 83,608,963 | 0.04 | LG-L |
| 3 | 84,003,744 | 84,479,736 | 0.57 | BW-U |

|   |             |             |      |      |
|---|-------------|-------------|------|------|
| 3 | 84,578,864  | 84,930,135  | 0.21 | LG-U |
| 3 | 84,902,600  | 84,966,481  | 0.05 | BW-L |
| 3 | 85,177,879  | 85,200,516  | 0.05 | LG-L |
| 3 | 85,554,148  | 85,586,798  | 0.07 | BW-L |
| 3 | 85,853,325  | 86,130,933  | 0.54 | BW-U |
| 3 | 86,536,016  | 86,944,863  | 0.23 | LG-U |
| 3 | 86,761,698  | 86,790,479  | 0.06 | LG-L |
| 3 | 87,619,886  | 87,650,101  | 0.20 | LG-U |
| 3 | 87,721,694  | 87,742,746  | 0.04 | BW-L |
| 3 | 88,313,311  | 88,333,452  | 0.07 | BW-L |
| 3 | 88,727,765  | 89,279,185  | 0.23 | LG-U |
| 3 | 88,931,225  | 88,946,473  | 0.07 | BW-L |
| 3 | 89,563,722  | 89,588,589  | 0.07 | BW-L |
| 3 | 89,727,787  | 89,750,187  | 0.06 | LG-L |
| 3 | 92,507,612  | 92,799,877  | 0.06 | BW-L |
| 3 | 92,524,510  | 93,095,228  | 0.04 | LG-L |
| 3 | 93,599,395  | 93,631,663  | 0.60 | BW-U |
| 3 | 93,601,314  | 93,624,740  | 0.21 | LG-U |
| 3 | 93,921,077  | 94,497,880  | 0.04 | LG-L |
| 3 | 94,433,991  | 94,453,489  | 0.07 | BW-L |
| 3 | 95,480,561  | 95,921,645  | 0.04 | BW-L |
| 3 | 95,616,557  | 95,654,119  | 0.20 | LG-U |
| 3 | 96,290,451  | 99,300,060  | 0.27 | LG-U |
| 3 | 96,547,005  | 98,832,005  | 0.72 | BW-U |
| 3 | 97,872,862  | 97,899,427  | 0.06 | BW-L |
| 3 | 99,459,637  | 99,484,526  | 0.08 | BW-L |
| 3 | 99,631,797  | 99,814,933  | 0.55 | BW-U |
| 3 | 100,982,436 | 100,995,415 | 0.07 | BW-L |
| 3 | 101,078,725 | 101,101,721 | 0.05 | LG-L |
| 3 | 101,730,331 | 102,011,543 | 0.04 | BW-L |
| 3 | 102,180,647 | 102,291,969 | 0.56 | BW-U |
| 3 | 102,235,429 | 102,822,585 | 0.27 | LG-U |
| 3 | 102,997,178 | 103,072,137 | 0.06 | BW-L |
| 3 | 104,461,540 | 104,493,074 | 0.21 | LG-U |
| 3 | 104,471,603 | 104,492,194 | 0.54 | BW-U |
| 3 | 109,365,580 | 109,395,871 | 0.05 | LG-L |
| 3 | 109,421,486 | 109,641,166 | 0.22 | LG-U |
| 4 | 251,064     | 300,288     | 0.07 | BW-L |
| 4 | 1,431,666   | 1,468,407   | 0.06 | LG-L |
| 4 | 3,132,604   | 3,186,108   | 0.03 | LG-L |
| 4 | 3,138,757   | 3,178,869   | 0.06 | BW-L |
| 4 | 3,853,836   | 3,886,019   | 0.06 | LG-L |
| 4 | 5,919,600   | 6,312,315   | 0.04 | LG-L |

|   |            |            |      |      |
|---|------------|------------|------|------|
| 4 | 5,974,587  | 6,004,044  | 0.07 | BW-L |
| 4 | 7,322,025  | 8,185,538  | 0.04 | LG-L |
| 4 | 9,136,756  | 9,170,523  | 0.05 | LG-L |
| 4 | 9,723,404  | 9,734,720  | 0.05 | LG-L |
| 4 | 9,946,469  | 10,583,512 | 0.22 | LG-U |
| 4 | 10,648,974 | 10,669,448 | 0.08 | BW-L |
| 4 | 13,054,965 | 13,082,572 | 0.06 | LG-L |
| 4 | 14,823,079 | 14,924,496 | 0.06 | BW-L |
| 4 | 14,976,792 | 15,637,478 | 0.04 | LG-L |
| 4 | 17,230,977 | 17,276,084 | 0.21 | LG-U |
| 4 | 17,867,315 | 17,938,216 | 0.24 | LG-U |
| 4 | 19,964,489 | 20,020,853 | 0.06 | BW-L |
| 4 | 20,708,869 | 20,828,812 | 0.05 | LG-L |
| 4 | 21,699,121 | 21,738,250 | 0.66 | BW-U |
| 4 | 21,905,221 | 21,936,770 | 0.05 | LG-L |
| 4 | 21,909,619 | 21,932,980 | 0.08 | BW-L |
| 4 | 22,820,765 | 22,846,729 | 0.20 | LG-U |
| 4 | 23,026,986 | 23,056,097 | 0.52 | BW-U |
| 4 | 25,176,714 | 25,282,754 | 0.58 | BW-U |
| 4 | 25,264,974 | 25,281,744 | 0.20 | LG-U |
| 4 | 25,782,537 | 25,977,294 | 0.05 | LG-L |
| 4 | 25,785,327 | 25,811,048 | 0.07 | BW-L |
| 4 | 26,512,347 | 26,545,215 | 0.51 | BW-U |
| 4 | 26,562,444 | 26,602,149 | 0.08 | BW-L |
| 4 | 26,691,151 | 26,738,311 | 0.20 | LG-U |
| 4 | 27,240,672 | 28,350,137 | 0.69 | BW-U |
| 4 | 31,808,891 | 32,227,764 | 0.80 | BW-U |
| 4 | 31,809,848 | 31,861,929 | 0.22 | LG-U |
| 4 | 32,577,588 | 32,615,957 | 0.05 | LG-L |
| 4 | 32,594,714 | 32,614,088 | 0.08 | BW-L |
| 4 | 33,236,851 | 33,273,246 | 0.05 | LG-L |
| 4 | 34,245,647 | 35,193,981 | 0.30 | LG-U |
| 4 | 36,251,637 | 36,343,275 | 0.23 | LG-U |
| 4 | 37,846,065 | 38,332,191 | 0.23 | LG-U |
| 4 | 38,508,826 | 39,422,947 | 0.01 | BW-L |
| 4 | 38,893,048 | 38,939,012 | 0.21 | LG-U |
| 4 | 40,467,287 | 40,499,788 | 0.04 | LG-L |
| 4 | 40,700,770 | 40,898,039 | 0.05 | BW-L |
| 4 | 40,814,799 | 40,869,822 | 0.24 | LG-U |
| 4 | 41,897,670 | 41,938,275 | 0.07 | BW-L |
| 4 | 42,076,152 | 42,252,792 | 0.22 | LG-U |
| 4 | 42,630,670 | 42,656,241 | 0.05 | LG-L |
| 4 | 43,350,537 | 43,397,242 | 0.05 | LG-L |

---

|   |            |            |      |      |
|---|------------|------------|------|------|
| 4 | 44,364,260 | 44,724,945 | 0.06 | BW-L |
| 4 | 46,163,339 | 46,198,136 | 0.22 | LG-U |
| 4 | 46,200,538 | 46,231,765 | 0.55 | BW-U |
| 4 | 47,671,719 | 47,707,281 | 0.05 | LG-L |
| 4 | 47,813,480 | 47,841,319 | 0.07 | BW-L |
| 4 | 49,729,505 | 50,943,820 | 0.70 | BW-U |
| 4 | 49,729,505 | 50,943,820 | 0.70 | BW-U |
| 4 | 49,979,208 | 50,010,939 | 0.21 | LG-U |
| 4 | 50,874,442 | 50,892,459 | 0.08 | BW-L |
| 4 | 51,594,973 | 52,458,269 | 0.06 | BW-L |
| 4 | 52,715,572 | 52,741,001 | 0.22 | LG-U |
| 4 | 53,387,763 | 53,873,864 | 0.20 | LG-U |
| 4 | 53,848,765 | 53,876,951 | 0.54 | BW-U |
| 4 | 54,218,710 | 54,244,359 | 0.05 | LG-L |
| 4 | 55,493,308 | 56,078,938 | 0.55 | BW-U |
| 4 | 56,465,637 | 56,553,996 | 0.00 | BW-L |
| 4 | 56,467,464 | 56,548,160 | 0.05 | LG-L |
| 4 | 56,714,160 | 56,736,952 | 0.20 | LG-U |
| 4 | 56,910,019 | 56,934,269 | 0.55 | BW-U |
| 4 | 57,961,333 | 57,983,149 | 0.07 | BW-L |
| 4 | 58,349,752 | 58,373,173 | 0.53 | BW-U |
| 4 | 59,771,750 | 59,805,562 | 0.05 | LG-L |
| 4 | 59,940,444 | 59,990,055 | 0.62 | BW-U |
| 4 | 59,947,628 | 59,982,597 | 0.22 | LG-U |
| 4 | 61,257,404 | 61,685,210 | 0.26 | LG-U |
| 4 | 62,344,704 | 62,362,262 | 0.52 | BW-U |
| 4 | 62,818,505 | 62,848,126 | 0.07 | BW-L |
| 4 | 62,819,755 | 62,851,795 | 0.05 | LG-L |
| 4 | 62,974,871 | 63,530,431 | 0.23 | LG-U |
| 4 | 64,558,175 | 64,576,699 | 0.06 | LG-L |
| 4 | 67,484,728 | 67,506,941 | 0.52 | BW-U |
| 4 | 68,682,964 | 68,742,420 | 0.23 | LG-U |
| 4 | 69,483,695 | 70,121,893 | 0.21 | LG-U |
| 4 | 69,660,565 | 70,124,312 | 0.54 | BW-U |
| 4 | 70,867,475 | 71,167,597 | 0.51 | BW-U |
| 4 | 70,956,333 | 71,175,698 | 0.21 | LG-U |
| 4 | 71,674,214 | 71,713,358 | 0.08 | BW-L |
| 4 | 71,919,395 | 72,407,398 | 0.23 | LG-U |
| 4 | 73,856,156 | 74,026,737 | 0.05 | LG-L |
| 4 | 74,345,049 | 74,387,805 | 0.64 | BW-U |
| 4 | 74,350,139 | 74,383,364 | 0.21 | LG-U |
| 4 | 74,587,540 | 75,568,422 | 0.03 | LG-L |
| 4 | 74,592,140 | 74,830,946 | 0.07 | BW-L |

---



|   |            |            |      |      |
|---|------------|------------|------|------|
| 4 | 75,435,907 | 75,492,233 | 0.73 | BW-U |
| 4 | 75,449,277 | 75,485,022 | 0.20 | LG-U |
| 4 | 76,684,890 | 77,151,194 | 0.06 | BW-L |
| 4 | 76,686,061 | 77,265,701 | 0.05 | LG-L |
| 4 | 81,079,351 | 81,101,682 | 0.05 | LG-L |
| 4 | 81,082,319 | 81,098,184 | 0.08 | BW-L |
| 4 | 81,321,604 | 82,505,144 | 0.58 | BW-U |
| 4 | 81,686,131 | 82,106,927 | 0.23 | LG-U |
| 4 | 82,817,430 | 82,863,103 | 0.03 | BW-L |
| 4 | 83,050,675 | 83,075,182 | 0.21 | LG-U |
| 4 | 84,986,909 | 85,014,470 | 0.06 | LG-L |
| 4 | 86,262,494 | 87,797,665 | 0.05 | LG-L |
| 4 | 86,748,955 | 86,901,424 | 0.55 | BW-U |
| 4 | 87,187,378 | 87,253,655 | 0.05 | BW-L |
| 4 | 89,120,494 | 89,190,965 | 0.21 | LG-U |
| 4 | 90,024,429 | 90,050,030 | 0.22 | LG-U |
| 5 | 510,501    | 1,780,710  | 0.05 | LG-L |
| 5 | 977,926    | 1,274,626  | 0.03 | BW-L |
| 5 | 4,246,343  | 4,339,249  | 0.02 | BW-L |
| 5 | 4,967,401  | 5,164,439  | 0.05 | LG-L |
| 5 | 6,802,661  | 6,841,097  | 0.22 | LG-U |
| 5 | 6,802,661  | 6,841,097  | 0.22 | LG-U |
| 5 | 7,551,596  | 7,567,858  | 0.20 | LG-U |
| 5 | 8,325,895  | 8,410,436  | 0.23 | LG-U |
| 5 | 8,918,803  | 8,940,570  | 0.20 | LG-U |
| 5 | 10,058,494 | 10,121,578 | 0.63 | BW-U |
| 5 | 11,990,130 | 12,329,589 | 0.23 | LG-U |
| 5 | 12,054,794 | 12,330,246 | 0.76 | BW-U |
| 5 | 13,145,143 | 13,500,321 | 0.54 | BW-U |
| 5 | 13,532,597 | 13,557,210 | 0.06 | LG-L |
| 5 | 14,001,319 | 14,018,826 | 0.08 | BW-L |
| 5 | 14,232,688 | 14,810,989 | 0.04 | LG-L |
| 5 | 14,657,174 | 14,673,513 | 0.08 | BW-L |
| 5 | 14,851,575 | 14,893,568 | 0.20 | LG-U |
| 5 | 15,486,412 | 15,510,497 | 0.06 | LG-L |
| 5 | 16,586,010 | 16,640,239 | 0.04 | LG-L |
| 5 | 17,449,400 | 17,789,282 | 0.55 | BW-U |
| 5 | 18,025,516 | 18,551,749 | 0.05 | LG-L |
| 5 | 18,262,172 | 18,289,211 | 0.07 | BW-L |
| 5 | 19,185,511 | 19,204,485 | 0.06 | LG-L |
| 5 | 19,438,004 | 19,468,098 | 0.08 | BW-L |
| 5 | 19,963,061 | 20,029,935 | 0.05 | LG-L |
| 5 | 20,365,923 | 21,052,848 | 0.06 | BW-L |

---

|   |            |            |      |      |
|---|------------|------------|------|------|
| 5 | 20,521,976 | 20,540,585 | 0.20 | LG-U |
| 5 | 20,680,566 | 20,883,656 | 0.05 | LG-L |
| 5 | 21,867,890 | 22,049,811 | 0.02 | BW-L |
| 5 | 21,933,423 | 22,251,646 | 0.02 | LG-L |
| 5 | 22,035,576 | 22,110,430 | 0.24 | LG-U |
| 5 | 22,825,255 | 23,061,317 | 0.22 | LG-U |
| 5 | 22,863,032 | 23,388,841 | 0.55 | BW-U |
| 5 | 22,863,032 | 23,388,841 | 0.55 | BW-U |
| 5 | 23,956,157 | 24,113,787 | 0.63 | BW-U |
| 5 | 23,971,310 | 25,010,763 | 0.26 | LG-U |
| 5 | 24,633,095 | 25,026,209 | 0.65 | BW-U |
| 5 | 25,499,392 | 25,519,779 | 0.06 | LG-L |
| 5 | 26,544,477 | 26,582,087 | 0.22 | LG-U |
| 5 | 26,544,477 | 26,643,893 | 0.58 | BW-U |
| 5 | 28,981,027 | 29,008,480 | 0.20 | LG-U |
| 5 | 29,051,196 | 29,071,915 | 0.07 | BW-L |
| 5 | 30,342,781 | 30,371,431 | 0.53 | BW-U |
| 5 | 30,559,879 | 31,928,539 | 0.04 | LG-L |
| 5 | 31,465,871 | 32,288,833 | 0.03 | BW-L |
| 5 | 33,103,817 | 33,135,162 | 0.52 | BW-U |
| 5 | 33,103,817 | 33,137,219 | 0.20 | LG-U |
| 5 | 34,352,062 | 35,330,953 | 0.68 | BW-U |
| 5 | 35,900,814 | 36,136,217 | 0.08 | BW-L |
| 5 | 36,166,430 | 37,060,516 | 0.22 | LG-U |
| 5 | 38,521,742 | 38,671,770 | 0.57 | BW-U |
| 5 | 39,289,649 | 40,264,973 | 0.63 | BW-U |
| 5 | 39,348,630 | 39,365,437 | 0.19 | LG-U |
| 5 | 39,450,519 | 39,475,433 | 0.05 | LG-L |
| 5 | 39,791,767 | 40,314,508 | 0.04 | BW-L |
| 5 | 40,074,894 | 40,450,659 | 0.04 | LG-L |
| 5 | 40,957,210 | 41,088,264 | 0.73 | BW-U |
| 5 | 41,015,998 | 41,066,763 | 0.21 | LG-U |
| 5 | 41,098,078 | 41,286,369 | 0.04 | BW-L |
| 5 | 41,244,628 | 41,292,983 | 0.05 | LG-L |
| 5 | 42,291,548 | 42,344,999 | 0.61 | BW-U |
| 5 | 42,304,673 | 42,576,203 | 0.20 | LG-U |
| 5 | 43,503,476 | 43,609,159 | 0.60 | BW-U |
| 5 | 43,568,781 | 43,876,059 | 0.22 | LG-U |
| 5 | 44,831,553 | 44,854,526 | 0.53 | BW-U |
| 5 | 45,376,451 | 45,404,204 | 0.05 | LG-L |
| 5 | 45,806,505 | 46,022,300 | 0.28 | LG-U |
| 5 | 46,907,007 | 46,938,010 | 0.06 | BW-L |
| 5 | 47,624,314 | 48,957,772 | 0.28 | LG-U |

---

|   |            |            |      |      |
|---|------------|------------|------|------|
| 5 | 48,067,550 | 48,776,793 | 0.60 | BW-U |
| 5 | 48,322,820 | 48,412,904 | 0.01 | BW-L |
| 5 | 49,627,505 | 49,645,376 | 0.53 | BW-U |
| 5 | 50,030,349 | 50,049,229 | 0.05 | LG-L |
| 5 | 51,621,719 | 51,673,026 | 0.05 | LG-L |
| 5 | 51,651,272 | 51,796,847 | 0.07 | BW-L |
| 5 | 52,843,645 | 52,866,444 | 0.07 | BW-L |
| 5 | 53,673,093 | 54,159,282 | 0.60 | BW-U |
| 5 | 53,682,807 | 54,061,913 | 0.22 | LG-U |
| 5 | 55,737,005 | 55,752,795 | 0.51 | BW-U |
| 5 | 57,638,705 | 57,652,541 | 0.54 | BW-U |
| 5 | 58,260,347 | 58,623,160 | 0.62 | BW-U |
| 6 | 506,960    | 521,203    | 0.06 | LG-L |
| 6 | 1,316,629  | 1,346,842  | 0.56 | BW-U |
| 6 | 2,718,275  | 2,740,956  | 0.20 | LG-U |
| 6 | 4,436,055  | 4,453,111  | 0.05 | LG-L |
| 6 | 5,608,614  | 5,638,696  | 0.56 | BW-U |
| 6 | 6,273,221  | 7,053,477  | 0.04 | LG-L |
| 6 | 6,736,516  | 6,755,866  | 0.08 | BW-L |
| 6 | 8,147,142  | 8,166,877  | 0.52 | BW-U |
| 6 | 8,616,953  | 8,653,362  | 0.06 | BW-L |
| 6 | 8,624,588  | 8,653,362  | 0.25 | LG-U |
| 6 | 10,845,832 | 10,864,118 | 0.51 | BW-U |
| 6 | 11,135,930 | 11,194,180 | 0.02 | BW-L |
| 6 | 11,155,546 | 11,194,180 | 0.04 | LG-L |
| 6 | 11,426,283 | 11,718,376 | 0.63 | BW-U |
| 6 | 11,556,814 | 11,715,668 | 0.22 | LG-U |
| 6 | 12,216,065 | 12,235,766 | 0.06 | LG-L |
| 6 | 12,474,480 | 12,898,970 | 0.07 | BW-L |
| 6 | 12,873,816 | 14,033,922 | 0.04 | LG-L |
| 6 | 13,178,679 | 13,198,091 | 0.55 | BW-U |
| 6 | 14,232,482 | 14,246,652 | 0.52 | BW-U |
| 6 | 15,244,342 | 16,230,630 | 0.04 | LG-L |
| 6 | 15,563,024 | 16,185,004 | 0.03 | BW-L |
| 6 | 16,954,997 | 16,992,291 | 0.04 | BW-L |
| 6 | 17,341,918 | 17,364,264 | 0.21 | LG-U |
| 6 | 17,896,885 | 18,093,687 | 0.01 | BW-L |
| 6 | 17,932,192 | 18,094,567 | 0.03 | LG-L |
| 6 | 18,820,119 | 18,834,336 | 0.51 | BW-U |
| 6 | 18,848,796 | 18,876,817 | 0.22 | LG-U |
| 6 | 18,900,349 | 18,931,393 | 0.07 | BW-L |
| 6 | 19,447,361 | 19,468,416 | 0.56 | BW-U |
| 6 | 20,550,571 | 20,566,437 | 0.07 | BW-L |

|   |            |            |      |      |
|---|------------|------------|------|------|
| 6 | 20,575,076 | 21,224,325 | 0.61 | BW-U |
| 6 | 20,758,401 | 21,532,271 | 0.27 | LG-U |
| 6 | 23,699,235 | 23,735,878 | 0.07 | BW-L |
| 6 | 24,122,542 | 24,336,907 | 0.04 | LG-L |
| 6 | 24,250,606 | 24,265,607 | 0.08 | BW-L |
| 6 | 25,761,112 | 26,129,140 | 0.05 | LG-L |
| 6 | 27,101,675 | 27,131,959 | 0.20 | LG-U |
| 6 | 30,123,982 | 30,158,636 | 0.21 | LG-U |
| 6 | 31,071,229 | 31,790,172 | 0.25 | LG-U |
| 6 | 31,752,445 | 31,790,172 | 0.65 | BW-U |
| 6 | 33,112,007 | 33,197,745 | 0.05 | LG-L |
| 7 | 284,853    | 774,594    | 0.03 | LG-L |
| 7 | 408,479    | 770,100    | 0.04 | BW-L |
| 7 | 1,851,523  | 2,413,069  | 0.06 | BW-L |
| 7 | 2,245,091  | 3,367,606  | 0.04 | LG-L |
| 7 | 3,286,513  | 3,307,527  | 0.52 | BW-U |
| 7 | 3,867,172  | 3,896,527  | 0.07 | BW-L |
| 7 | 4,144,081  | 4,605,926  | 0.05 | LG-L |
| 7 | 4,697,775  | 4,723,416  | 0.54 | BW-U |
| 7 | 5,493,807  | 5,810,496  | 0.21 | LG-U |
| 7 | 5,771,768  | 5,875,632  | 0.74 | BW-U |
| 7 | 6,558,584  | 6,583,082  | 0.05 | LG-L |
| 7 | 7,753,711  | 7,892,864  | 0.06 | BW-L |
| 7 | 8,452,184  | 8,603,603  | 0.04 | LG-L |
| 7 | 8,577,923  | 8,603,603  | 0.06 | BW-L |
| 7 | 9,276,545  | 9,300,834  | 0.07 | BW-L |
| 7 | 9,923,396  | 9,958,693  | 0.05 | BW-L |
| 7 | 10,874,012 | 11,220,202 | 0.20 | LG-U |
| 7 | 11,106,507 | 11,171,947 | 0.07 | BW-L |
| 7 | 12,072,361 | 12,090,467 | 0.05 | LG-L |
| 7 | 13,147,924 | 14,456,327 | 0.05 | LG-L |
| 7 | 13,887,433 | 13,919,939 | 0.67 | BW-U |
| 7 | 14,448,385 | 14,468,635 | 0.06 | BW-L |
| 7 | 16,311,552 | 16,332,231 | 0.21 | LG-U |
| 7 | 16,404,488 | 16,550,038 | 0.62 | BW-U |
| 7 | 17,029,531 | 17,050,182 | 0.06 | BW-L |
| 7 | 17,131,374 | 17,301,699 | 0.64 | BW-U |
| 7 | 17,251,168 | 17,301,672 | 0.22 | LG-U |
| 7 | 17,886,824 | 17,949,237 | 0.55 | BW-U |
| 7 | 17,987,106 | 18,637,425 | 0.20 | LG-U |
| 7 | 18,617,357 | 18,808,978 | 0.65 | BW-U |
| 7 | 19,704,808 | 19,919,070 | 0.05 | LG-L |
| 7 | 21,253,136 | 21,272,259 | 0.05 | BW-L |

|   |            |            |      |      |
|---|------------|------------|------|------|
| 7 | 21,268,839 | 21,335,902 | 0.59 | BW-U |
| 7 | 23,290,513 | 23,347,145 | 0.04 | LG-L |
| 7 | 23,302,539 | 23,337,011 | 0.07 | BW-L |
| 7 | 24,185,661 | 24,499,912 | 0.04 | LG-L |
| 7 | 24,188,665 | 25,244,175 | 0.03 | BW-L |
| 7 | 24,794,665 | 24,822,035 | 0.21 | LG-U |
| 7 | 25,218,423 | 25,239,613 | 0.05 | LG-L |
| 7 | 25,465,604 | 25,531,175 | 0.60 | BW-U |
| 7 | 26,063,650 | 26,106,105 | 0.05 | LG-L |
| 7 | 26,604,752 | 27,008,916 | 0.62 | BW-U |
| 7 | 26,689,636 | 26,726,268 | 0.21 | LG-U |
| 7 | 27,617,034 | 27,638,269 | 0.08 | BW-L |
| 7 | 28,360,752 | 28,880,095 | 0.05 | LG-L |
| 7 | 28,750,099 | 28,883,268 | 0.06 | BW-L |
| 7 | 29,015,530 | 29,064,866 | 0.53 | BW-U |
| 7 | 30,313,241 | 30,668,289 | 0.54 | BW-U |
| 7 | 30,519,273 | 30,668,289 | 0.21 | LG-U |
| 7 | 31,441,026 | 31,585,502 | 0.05 | LG-L |
| 7 | 31,717,186 | 31,737,269 | 0.55 | BW-U |
| 7 | 31,718,114 | 31,735,504 | 0.20 | LG-U |
| 7 | 32,482,607 | 32,507,176 | 0.05 | LG-L |
| 7 | 33,481,910 | 33,500,769 | 0.06 | LG-L |
| 7 | 35,133,240 | 35,323,399 | 0.53 | BW-U |
| 7 | 35,838,428 | 35,868,104 | 0.55 | BW-U |
| 8 | 281,789    | 1,132,843  | 0.80 | BW-U |
| 8 | 349,501    | 2,042,862  | 0.25 | LG-U |
| 8 | 2,110,522  | 2,217,296  | 0.53 | BW-U |
| 8 | 3,101,720  | 3,120,454  | 0.05 | LG-L |
| 8 | 3,957,847  | 4,391,577  | 0.20 | LG-U |
| 8 | 5,879,372  | 5,912,374  | 0.22 | LG-U |
| 8 | 5,883,583  | 5,922,717  | 0.64 | BW-U |
| 8 | 6,472,570  | 6,498,568  | 0.07 | BW-L |
| 8 | 7,052,741  | 7,503,592  | 0.05 | LG-L |
| 8 | 7,054,374  | 7,066,873  | 0.08 | BW-L |
| 8 | 8,204,654  | 8,563,104  | 0.04 | LG-L |
| 8 | 8,644,253  | 9,477,770  | 0.01 | BW-L |
| 8 | 8,760,964  | 9,516,304  | 0.29 | LG-U |
| 8 | 10,735,171 | 11,407,663 | 0.24 | LG-U |
| 8 | 11,325,168 | 12,171,174 | 0.05 | BW-L |
| 8 | 11,680,461 | 12,182,135 | 0.04 | LG-L |
| 8 | 12,952,124 | 12,997,959 | 0.07 | BW-L |
| 8 | 14,072,533 | 14,225,749 | 0.27 | LG-U |
| 8 | 14,567,533 | 14,587,407 | 0.53 | BW-U |

|   |            |            |      |      |
|---|------------|------------|------|------|
| 8 | 15,435,059 | 15,453,896 | 0.08 | BW-L |
| 8 | 17,265,656 | 17,297,539 | 0.06 | LG-L |
| 8 | 17,428,976 | 17,469,904 | 0.21 | LG-U |
| 8 | 17,443,889 | 17,471,534 | 0.53 | BW-U |
| 8 | 17,805,679 | 17,821,973 | 0.08 | BW-L |
| 8 | 18,089,557 | 18,935,397 | 0.05 | LG-L |
| 8 | 18,913,230 | 18,945,051 | 0.06 | BW-L |
| 8 | 20,551,778 | 20,567,168 | 0.06 | LG-L |
| 8 | 21,398,144 | 21,411,425 | 0.51 | BW-U |
| 8 | 22,507,666 | 22,522,489 | 0.08 | BW-L |
| 8 | 23,160,976 | 23,356,127 | 0.05 | BW-L |
| 8 | 23,197,307 | 23,829,662 | 0.03 | LG-L |
| 8 | 24,704,482 | 24,721,574 | 0.51 | BW-U |
| 8 | 25,929,349 | 25,966,042 | 0.04 | BW-L |
| 8 | 27,125,740 | 27,141,443 | 0.20 | LG-U |
| 8 | 27,365,262 | 27,406,966 | 0.06 | BW-L |
| 8 | 27,629,847 | 27,653,942 | 0.06 | LG-L |
| 9 | 1,055,233  | 1,125,406  | 0.21 | LG-U |
| 9 | 2,060,601  | 2,089,638  | 0.53 | BW-U |
| 9 | 3,926,355  | 3,942,073  | 0.05 | LG-L |
| 9 | 4,985,319  | 5,759,716  | 0.24 | LG-U |
| 9 | 5,201,413  | 5,690,758  | 0.73 | BW-U |
| 9 | 6,106,107  | 6,146,570  | 0.03 | BW-L |
| 9 | 6,320,435  | 6,764,558  | 0.22 | LG-U |
| 9 | 6,437,123  | 6,466,137  | 0.52 | BW-U |
| 9 | 7,671,979  | 7,684,530  | 0.08 | BW-L |
| 9 | 7,796,160  | 7,872,055  | 0.56 | BW-U |
| 9 | 9,528,481  | 9,888,387  | 0.04 | LG-L |
| 9 | 9,769,069  | 9,878,672  | 0.07 | BW-L |
| 9 | 11,054,877 | 11,092,713 | 0.08 | BW-L |
| 9 | 11,257,105 | 12,147,823 | 0.05 | LG-L |
| 9 | 11,806,336 | 12,031,014 | 0.02 | BW-L |
| 9 | 12,601,916 | 13,551,709 | 0.22 | LG-U |
| 9 | 12,921,550 | 13,277,653 | 0.63 | BW-U |
| 9 | 16,006,687 | 17,001,069 | 0.24 | LG-U |
| 9 | 18,116,590 | 18,498,695 | 0.19 | LG-U |
| 9 | 19,841,287 | 19,872,151 | 0.04 | BW-L |
| 9 | 19,845,629 | 19,922,704 | 0.05 | LG-L |
| 9 | 20,406,745 | 20,428,065 | 0.60 | BW-U |
| 9 | 20,410,071 | 20,422,153 | 0.20 | LG-U |
| 9 | 21,944,789 | 21,960,624 | 0.05 | LG-L |
| 9 | 22,818,301 | 22,831,521 | 0.05 | LG-L |
| 9 | 23,109,187 | 23,467,664 | 0.24 | LG-U |

|    |            |            |      |      |
|----|------------|------------|------|------|
| 9  | 23,184,081 | 23,524,498 | 0.78 | BW-U |
| 10 | 2,597,360  | 2,628,200  | 0.20 | LG-U |
| 10 | 3,116,398  | 3,129,335  | 0.51 | BW-U |
| 10 | 3,940,389  | 3,953,752  | 0.51 | BW-U |
| 10 | 3,958,924  | 3,969,539  | 0.20 | LG-U |
| 10 | 4,843,362  | 5,709,976  | 0.24 | LG-U |
| 10 | 5,030,766  | 5,153,695  | 0.67 | BW-U |
| 10 | 5,691,893  | 6,137,104  | 0.07 | BW-L |
| 10 | 6,502,500  | 7,022,210  | 0.67 | BW-U |
| 10 | 6,505,595  | 8,215,135  | 0.24 | LG-U |
| 10 | 10,299,507 | 10,319,243 | 0.20 | LG-U |
| 10 | 11,182,653 | 11,227,115 | 0.56 | BW-U |
| 10 | 11,624,103 | 12,109,182 | 0.03 | BW-L |
| 10 | 11,759,591 | 11,776,731 | 0.21 | LG-U |
| 10 | 12,573,915 | 12,591,024 | 0.05 | LG-L |
| 10 | 13,135,332 | 13,174,402 | 0.04 | BW-L |
| 10 | 13,364,868 | 13,558,518 | 0.05 | LG-L |
| 10 | 15,016,955 | 15,385,946 | 0.05 | BW-L |
| 10 | 15,017,526 | 15,038,968 | 0.05 | LG-L |
| 10 | 16,728,992 | 16,828,739 | 0.03 | BW-L |
| 10 | 16,749,702 | 16,770,696 | 0.21 | LG-U |
| 10 | 19,261,282 | 19,337,388 | 0.59 | BW-U |
| 11 | 40,717     | 240,158    | 0.21 | LG-U |
| 11 | 719,301    | 738,818    | 0.06 | BW-L |
| 11 | 1,511,157  | 1,546,605  | 0.06 | BW-L |
| 11 | 1,971,351  | 2,004,302  | 0.22 | LG-U |
| 11 | 2,160,518  | 2,198,778  | 0.05 | LG-L |
| 11 | 2,475,651  | 2,508,394  | 0.07 | BW-L |
| 11 | 3,399,240  | 3,957,997  | 0.03 | LG-L |
| 11 | 3,536,097  | 3,656,006  | 0.06 | BW-L |
| 11 | 4,404,436  | 4,461,344  | 0.54 | BW-U |
| 11 | 5,271,442  | 5,459,365  | 0.04 | LG-L |
| 11 | 5,273,655  | 5,287,126  | 0.07 | BW-L |
| 11 | 6,447,932  | 7,787,022  | 0.05 | LG-L |
| 11 | 6,711,298  | 6,737,456  | 0.05 | BW-L |
| 11 | 7,420,141  | 7,434,080  | 0.07 | BW-L |
| 11 | 9,958,471  | 11,856,923 | 0.64 | BW-U |
| 11 | 10,141,802 | 10,165,396 | 0.24 | LG-U |
| 11 | 10,389,169 | 10,413,329 | 0.08 | BW-L |
| 11 | 12,218,095 | 13,597,179 | 0.04 | LG-L |
| 11 | 12,419,681 | 12,731,242 | 0.66 | BW-U |
| 11 | 12,708,380 | 12,731,242 | 0.20 | LG-U |
| 11 | 12,728,008 | 13,783,420 | 0.01 | BW-L |

|    |            |            |      |      |
|----|------------|------------|------|------|
| 11 | 14,557,272 | 14,775,605 | 0.05 | LG-L |
| 11 | 14,962,152 | 14,983,836 | 0.54 | BW-U |
| 11 | 16,575,309 | 16,598,473 | 0.22 | LG-U |
| 11 | 16,577,128 | 16,596,724 | 0.51 | BW-U |
| 11 | 17,590,794 | 17,663,153 | 0.05 | LG-L |
| 11 | 17,732,646 | 17,782,166 | 0.64 | BW-U |
| 11 | 18,282,962 | 19,151,209 | 0.67 | BW-U |
| 11 | 18,779,388 | 19,150,008 | 0.22 | LG-U |
| 12 | 119,040    | 523,792    | 0.03 | LG-L |
| 12 | 122,874    | 164,864    | 0.05 | BW-L |
| 12 | 1,906,487  | 2,060,958  | 0.05 | BW-L |
| 12 | 1,908,738  | 2,064,123  | 0.05 | LG-L |
| 12 | 2,238,508  | 2,266,845  | 0.20 | LG-U |
| 12 | 3,451,706  | 3,645,802  | 0.06 | BW-L |
| 12 | 3,509,011  | 3,546,241  | 0.05 | LG-L |
| 12 | 3,771,722  | 3,841,240  | 0.26 | LG-U |
| 12 | 4,403,154  | 4,466,687  | 0.02 | BW-L |
| 12 | 4,690,825  | 5,044,996  | 0.20 | LG-U |
| 12 | 5,667,658  | 5,698,499  | 0.59 | BW-U |
| 12 | 5,667,658  | 6,733,716  | 0.24 | LG-U |
| 12 | 5,910,281  | 5,926,563  | 0.08 | BW-L |
| 12 | 7,317,340  | 7,332,162  | 0.05 | LG-L |
| 12 | 7,803,962  | 7,862,597  | 0.06 | BW-L |
| 12 | 8,368,655  | 8,382,746  | 0.20 | LG-U |
| 12 | 8,652,702  | 8,872,763  | 0.06 | BW-L |
| 12 | 8,986,336  | 9,007,583  | 0.22 | LG-U |
| 12 | 10,063,913 | 10,321,195 | 0.04 | LG-L |
| 12 | 10,160,209 | 10,209,630 | 0.06 | BW-L |
| 12 | 11,000,510 | 11,025,166 | 0.06 | LG-L |
| 12 | 12,294,963 | 12,313,153 | 0.06 | BW-L |
| 12 | 13,973,047 | 14,676,774 | 0.25 | LG-U |
| 12 | 14,035,519 | 14,686,314 | 0.56 | BW-U |
| 12 | 15,325,598 | 15,833,183 | 0.20 | LG-U |
| 12 | 17,401,984 | 17,418,141 | 0.05 | LG-L |
| 12 | 18,911,147 | 19,113,787 | 0.58 | BW-U |
| 13 | 234,276    | 262,443    | 0.04 | LG-L |
| 13 | 342,639    | 397,667    | 0.07 | BW-L |
| 13 | 441,255    | 475,699    | 0.20 | LG-U |
| 13 | 3,287,378  | 3,503,171  | 0.01 | BW-L |
| 13 | 3,564,294  | 3,856,190  | 0.22 | LG-U |
| 13 | 4,202,851  | 4,744,712  | 0.68 | BW-U |
| 13 | 4,401,836  | 4,625,853  | 0.05 | LG-L |
| 13 | 4,720,342  | 5,947,799  | 0.24 | LG-U |



|    |            |            |      |      |
|----|------------|------------|------|------|
| 13 | 5,266,290  | 5,970,819  | 0.72 | BW-U |
| 13 | 6,455,173  | 6,942,705  | 0.22 | LG-U |
| 13 | 6,761,239  | 6,780,079  | 0.05 | BW-L |
| 13 | 6,764,018  | 6,788,139  | 0.05 | LG-L |
| 13 | 8,125,844  | 8,545,656  | 0.24 | LG-U |
| 13 | 9,059,129  | 9,072,357  | 0.20 | LG-U |
| 13 | 10,739,070 | 10,959,942 | 0.24 | LG-U |
| 13 | 10,749,566 | 10,770,453 | 0.56 | BW-U |
| 13 | 11,817,905 | 11,967,748 | 0.57 | BW-U |
| 13 | 11,824,689 | 11,966,327 | 0.22 | LG-U |
| 13 | 13,015,277 | 13,076,973 | 0.06 | BW-L |
| 13 | 13,088,598 | 13,217,050 | 0.22 | LG-U |
| 13 | 13,247,762 | 13,266,104 | 0.53 | BW-U |
| 13 | 13,605,008 | 14,119,842 | 0.05 | LG-L |
| 13 | 16,765,338 | 16,812,700 | 0.57 | BW-U |
| 14 | 3,131,906  | 3,144,043  | 0.52 | BW-U |
| 14 | 4,751,385  | 4,762,906  | 0.05 | LG-L |
| 14 | 5,334,151  | 5,348,822  | 0.05 | LG-L |
| 14 | 6,592,604  | 6,612,979  | 0.60 | BW-U |
| 14 | 6,600,578  | 6,611,090  | 0.19 | LG-U |
| 14 | 8,339,375  | 8,380,144  | 0.05 | BW-L |
| 14 | 8,871,570  | 8,890,411  | 0.22 | LG-U |
| 14 | 8,931,595  | 9,210,963  | 0.08 | BW-L |
| 14 | 9,786,357  | 9,832,071  | 0.07 | BW-L |
| 14 | 9,950,461  | 9,962,966  | 0.05 | LG-L |
| 14 | 10,094,666 | 10,651,045 | 0.20 | LG-U |
| 14 | 10,672,789 | 11,047,682 | 0.05 | LG-L |
| 14 | 11,098,748 | 11,119,226 | 0.06 | BW-L |
| 14 | 11,301,673 | 11,768,724 | 0.55 | BW-U |
| 14 | 12,082,872 | 12,098,627 | 0.20 | LG-U |
| 14 | 13,480,437 | 13,492,784 | 0.08 | BW-L |
| 14 | 14,141,880 | 14,166,235 | 0.06 | LG-L |
| 14 | 14,565,105 | 14,588,046 | 0.64 | BW-U |
| 14 | 14,888,073 | 14,994,356 | 0.01 | BW-L |
| 14 | 15,068,865 | 15,079,586 | 0.06 | LG-L |
| 15 | 2,839,053  | 2,870,587  | 0.20 | LG-U |
| 15 | 2,839,053  | 3,216,526  | 0.59 | BW-U |
| 15 | 3,009,623  | 3,296,013  | 0.05 | BW-L |
| 15 | 3,856,434  | 4,284,717  | 0.64 | BW-U |
| 15 | 3,912,150  | 3,962,589  | 0.21 | LG-U |
| 15 | 4,175,622  | 4,197,555  | 0.05 | LG-L |
| 15 | 4,901,199  | 5,331,355  | 0.64 | BW-U |
| 15 | 4,902,360  | 6,633,772  | 0.27 | LG-U |

|    |            |            |      |      |
|----|------------|------------|------|------|
| 15 | 6,327,654  | 6,338,107  | 0.51 | BW-U |
| 15 | 7,688,594  | 8,012,867  | 0.23 | LG-U |
| 15 | 7,938,942  | 7,987,510  | 0.55 | BW-U |
| 15 | 11,230,733 | 11,603,526 | 0.21 | LG-U |
| 15 | 11,786,789 | 11,804,151 | 0.07 | BW-L |
| 16 | 216,322    | 455,298    | 0.04 | LG-L |
| 16 | 226,229    | 487,103    | 0.07 | BW-L |
| 17 | 76,944     | 443,272    | 0.08 | BW-L |
| 17 | 1,312,250  | 1,342,971  | 0.55 | BW-U |
| 17 | 1,802,893  | 2,280,597  | 0.03 | BW-L |
| 17 | 1,804,220  | 1,818,467  | 0.06 | LG-L |
| 17 | 2,321,217  | 2,360,843  | 0.04 | LG-L |
| 17 | 4,654,736  | 4,669,706  | 0.06 | LG-L |
| 17 | 5,213,727  | 5,994,107  | 0.04 | LG-L |
| 17 | 5,982,669  | 5,991,227  | 0.08 | BW-L |
| 17 | 6,764,700  | 7,875,530  | 0.04 | LG-L |
| 17 | 7,247,519  | 7,764,300  | 0.05 | BW-L |
| 17 | 9,399,900  | 9,422,487  | 0.20 | LG-U |
| 17 | 10,335,914 | 10,521,138 | 0.23 | LG-U |
| 17 | 10,449,724 | 10,505,360 | 0.55 | BW-U |
| 18 | 229,696    | 399,260    | 0.66 | BW-U |
| 18 | 2,375,733  | 2,663,264  | 0.20 | LG-U |
| 18 | 2,552,510  | 2,574,823  | 0.54 | BW-U |
| 18 | 4,286,374  | 4,303,003  | 0.06 | LG-L |
| 18 | 4,741,043  | 4,813,790  | 0.66 | BW-U |
| 18 | 6,055,628  | 6,498,422  | 0.05 | BW-L |
| 18 | 6,204,103  | 6,425,397  | 0.05 | LG-L |
| 18 | 6,921,224  | 7,300,510  | 0.65 | BW-U |
| 18 | 7,232,603  | 7,252,405  | 0.20 | LG-U |
| 18 | 7,749,977  | 8,107,403  | 0.07 | BW-L |
| 18 | 7,816,669  | 8,571,471  | 0.60 | BW-U |
| 18 | 10,113,905 | 10,913,287 | 0.04 | BW-L |
| 18 | 10,337,383 | 10,913,287 | 0.04 | LG-L |
| 19 | 1,014,177  | 1,257,871  | 0.20 | LG-U |
| 19 | 1,634,050  | 1,652,196  | 0.05 | LG-L |
| 19 | 1,636,792  | 1,651,799  | 0.08 | BW-L |
| 19 | 3,088,945  | 3,101,647  | 0.08 | BW-L |
| 19 | 4,068,455  | 4,086,377  | 0.54 | BW-U |
| 19 | 4,068,995  | 4,082,773  | 0.19 | LG-U |
| 19 | 4,472,108  | 5,015,459  | 0.05 | LG-L |
| 19 | 4,684,240  | 4,709,645  | 0.07 | BW-L |
| 19 | 6,776,994  | 6,798,020  | 0.57 | BW-U |
| 19 | 7,356,795  | 7,454,495  | 0.58 | BW-U |

|    |            |            |      |            |
|----|------------|------------|------|------------|
| 19 | 8,059,065  | 8,072,964  | 0.57 | BW-U       |
| 19 | 9,021,084  | 9,692,450  | 0.06 | BW-L       |
| 19 | 9,204,093  | 9,247,281  | 0.05 | LG-L       |
| 19 | 9,997,421  | 10,036,359 | 0.05 | LG-L       |
| 20 | 596,479    | 1,695,129  | 0.67 | BW-U       |
| 20 | 1,406,279  | 1,430,522  | 0.07 | BW-L       |
| 20 | 1,544,547  | 1,648,728  | 0.22 | LG-U       |
| 20 | 3,910,723  | 4,203,773  | 0.20 | LG-U       |
| 20 | 4,190,510  | 4,205,386  | 0.52 | BW-U       |
| 20 | 5,128,650  | 5,147,475  | 0.20 | LG-U       |
| 20 | 5,398,811  | 5,418,338  | 0.08 | BW-L       |
| 20 | 5,669,632  | 7,739,886  | 0.28 | LG-U       |
| 20 | 5,694,658  | 7,883,011  | 0.76 | BW-U       |
| 20 | 8,402,139  | 8,888,304  | 0.53 | BW-U       |
| 20 | 8,660,115  | 8,678,680  | 0.20 | LG-U       |
| 20 | 9,158,598  | 9,392,219  | 0.06 | BW-L       |
| 20 | 9,821,452  | 9,925,236  | 0.05 | LG-L       |
| 20 | 10,779,999 | 10,808,468 | 0.08 | BW-L       |
| 20 | 10,877,639 | 10,895,105 | 0.51 | BW-U       |
| 20 | 10,897,733 | 10,918,297 | 0.05 | LG-L       |
| 20 | 12,630,029 | 12,648,306 | 0.06 | LG-L, BW-L |
| 20 | 13,125,673 | 13,145,449 | 0.63 | BW-U       |
| 20 | 13,443,919 | 14,117,013 | 0.03 | LG-L       |
| 20 | 13,559,577 | 14,110,878 | 0.04 | BW-L       |
| 21 | 1,412,280  | 1,948,872  | 0.04 | BW-L       |
| 21 | 1,414,066  | 1,773,511  | 0.04 | LG-L       |
| 21 | 2,636,035  | 3,145,352  | 0.20 | LG-U       |
| 21 | 3,120,503  | 3,143,971  | 0.52 | BW-U       |
| 21 | 3,240,713  | 3,820,507  | 0.05 | BW-L       |
| 21 | 3,409,989  | 3,433,368  | 0.04 | LG-L       |
| 21 | 3,877,336  | 3,900,212  | 0.53 | BW-U       |
| 21 | 4,696,605  | 5,074,167  | 0.63 | BW-U       |
| 21 | 4,700,306  | 4,708,223  | 0.20 | LG-U       |
| 21 | 5,604,707  | 5,618,687  | 0.57 | BW-U       |
| 22 | 234,053    | 325,069    | 0.03 | LG-L       |
| 22 | 246,914    | 313,138    | 0.00 | BW-L       |
| 22 | 818,639    | 873,758    | 0.08 | BW-L       |
| 22 | 1,546,280  | 2,239,440  | 0.07 | BW-L       |
| 22 | 1,690,912  | 1,787,697  | 0.58 | BW-U       |
| 22 | 1,763,070  | 1,782,072  | 0.21 | LG-U       |
| 22 | 1,899,878  | 2,339,996  | 0.05 | LG-L       |
| 22 | 3,400,232  | 3,632,706  | 0.01 | BW-L       |
| 22 | 3,625,742  | 3,632,958  | 0.05 | LG-L       |

|    |           |           |      |      |
|----|-----------|-----------|------|------|
| 23 | 70,130    | 163,504   | 0.05 | LG-L |
| 23 | 211,755   | 236,167   | 0.56 | BW-U |
| 23 | 833,995   | 946,265   | 0.60 | BW-U |
| 23 | 838,775   | 883,063   | 0.20 | LG-U |
| 23 | 3,063,562 | 5,253,343 | 0.04 | LG-L |
| 23 | 3,506,566 | 3,526,024 | 0.06 | BW-L |
| 23 | 4,160,011 | 5,286,741 | 0.06 | BW-L |
| 24 | 16,009    | 665,935   | 0.04 | LG-L |
| 24 | 32,849    | 178,257   | 0.07 | BW-L |
| 24 | 1,100,667 | 1,148,998 | 0.55 | BW-U |
| 24 | 2,639,395 | 2,647,933 | 0.08 | BW-L |
| 24 | 3,554,559 | 3,579,220 | 0.53 | BW-U |
| 24 | 3,561,409 | 3,579,220 | 0.19 | LG-U |
| 24 | 3,843,336 | 3,856,474 | 0.05 | LG-L |
| 24 | 3,982,629 | 3,993,700 | 0.08 | BW-L |
| 24 | 4,478,106 | 4,504,047 | 0.05 | LG-L |
| 24 | 5,321,343 | 6,279,737 | 0.05 | BW-L |
| 24 | 5,817,540 | 5,912,543 | 0.05 | LG-L |
| 24 | 6,158,505 | 6,194,686 | 0.54 | BW-U |
| 25 | 1,012,824 | 1,177,961 | 0.24 | LG-U |
| 25 | 1,130,229 | 1,144,719 | 0.05 | BW-L |
| 25 | 1,164,079 | 1,177,961 | 0.52 | BW-U |
| 25 | 1,525,469 | 2,103,505 | 0.04 | LG-L |
| 25 | 1,694,849 | 1,810,947 | 0.07 | BW-L |
| 26 | 8,294     | 289,726   | 0.02 | LG-L |
| 26 | 68,665    | 280,290   | 0.03 | BW-L |
| 26 | 1,341,969 | 1,811,160 | 0.06 | LG-L |
| 26 | 2,370,211 | 2,808,626 | 0.05 | LG-L |
| 26 | 3,221,916 | 3,314,291 | 0.21 | LG-U |
| 26 | 3,410,677 | 3,687,149 | 0.52 | BW-U |
| 26 | 4,961,676 | 5,071,189 | 0.05 | LG-L |
| 27 | 3,594     | 1,112,116 | 0.02 | LG-L |
| 27 | 3,594     | 1,205,084 | 0.03 | BW-L |
| 27 | 1,770,715 | 1,785,086 | 0.07 | BW-L |
| 27 | 2,173,155 | 2,907,109 | 0.05 | LG-L |
| 27 | 2,391,486 | 2,404,523 | 0.07 | BW-L |
| 27 | 4,599,444 | 5,184,681 | 0.03 | LG-L |
| 27 | 4,608,449 | 5,180,934 | 0.04 | BW-L |
| 28 | 449,850   | 951,082   | 0.05 | BW-L |
| 28 | 507,443   | 518,782   | 0.06 | LG-L |
| 28 | 1,591,032 | 1,996,687 | 0.05 | BW-L |
| 28 | 1,639,079 | 2,030,272 | 0.04 | LG-L |
| 28 | 2,607,017 | 2,621,935 | 0.05 | LG-L |

|    |            |            |      |      |
|----|------------|------------|------|------|
| 28 | 3,609,562  | 3,634,986  | 0.06 | BW-L |
| 28 | 3,609,562  | 3,786,389  | 0.05 | LG-L |
| 40 | 156,197    | 174,988    | 0.04 | LG-L |
| 40 | 157,443    | 265,926    | 0.06 | BW-L |
| 40 | 813,141    | 856,880    | 0.05 | LG-L |
| 41 | 95,135     | 405,077    | 0.04 | LG-L |
| Z  | 925,002    | 959,914    | 0.27 | LG-U |
| Z  | 3,087,524  | 3,124,257  | 0.07 | LG-L |
| Z  | 9,075,584  | 9,923,249  | 0.06 | LG-L |
| Z  | 9,077,792  | 9,101,549  | 0.07 | BW-L |
| Z  | 10,063,235 | 10,271,603 | 0.29 | LG-U |
| Z  | 11,595,755 | 12,205,089 | 0.00 | BW-L |
| Z  | 12,052,641 | 12,604,587 | 0.05 | LG-L |
| Z  | 13,877,639 | 13,932,821 | 0.29 | LG-U |
| Z  | 15,469,173 | 16,239,232 | 0.05 | LG-L |
| Z  | 15,472,480 | 15,922,582 | 0.06 | BW-L |
| Z  | 16,944,353 | 16,975,567 | 0.07 | LG-L |
| Z  | 17,157,214 | 17,202,688 | 0.31 | LG-U |
| Z  | 17,242,521 | 17,271,710 | 0.07 | BW-L |
| Z  | 17,869,228 | 17,941,316 | 0.32 | LG-U |
| Z  | 18,685,214 | 19,223,959 | 0.05 | BW-L |
| Z  | 18,783,898 | 18,814,715 | 0.28 | LG-U |
| Z  | 19,343,727 | 19,499,379 | 0.30 | LG-U |
| Z  | 20,033,586 | 20,208,207 | 0.01 | BW-L |
| Z  | 21,623,129 | 21,648,745 | 0.07 | BW-L |
| Z  | 22,002,694 | 22,024,547 | 0.28 | LG-U |
| Z  | 22,071,564 | 22,095,330 | 0.80 | BW-U |
| Z  | 22,834,213 | 22,879,298 | 0.02 | BW-L |
| Z  | 23,912,936 | 23,942,979 | 0.28 | LG-U |
| Z  | 25,082,461 | 25,104,891 | 0.79 | BW-U |
| Z  | 25,638,064 | 26,752,468 | 1.00 | BW-U |
| Z  | 26,649,096 | 26,770,218 | 0.28 | LG-U |
| Z  | 32,422,731 | 32,454,768 | 0.28 | LG-U |
| Z  | 33,218,363 | 33,282,384 | 0.84 | BW-U |
| Z  | 35,691,090 | 35,922,554 | 0.86 | BW-U |
| Z  | 36,065,884 | 36,604,428 | 0.04 | BW-L |
| Z  | 38,395,052 | 40,008,371 | 0.33 | LG-U |
| Z  | 38,469,345 | 40,008,371 | 0.95 | BW-U |
| Z  | 40,637,636 | 40,685,742 | 0.06 | BW-L |
| Z  | 40,880,276 | 40,970,302 | 0.89 | BW-U |
| Z  | 42,207,351 | 46,282,225 | 1.00 | BW-U |
| Z  | 44,189,764 | 44,217,864 | 0.00 | BW-L |
| Z  | 44,191,555 | 44,211,186 | 0.07 | LG-L |

|   |            |            |      |      |
|---|------------|------------|------|------|
| Z | 44,485,699 | 44,653,110 | 0.31 | LG-U |
| Z | 45,942,267 | 46,278,712 | 0.31 | LG-U |
| Z | 46,363,571 | 46,483,688 | 0.00 | BW-L |
| Z | 46,451,947 | 46,479,545 | 0.07 | LG-L |
| Z | 47,453,819 | 47,497,982 | 0.86 | BW-U |
| Z | 47,458,699 | 47,492,507 | 0.29 | LG-U |
| Z | 48,608,945 | 49,004,990 | 0.00 | BW-L |
| Z | 48,821,026 | 48,894,253 | 0.06 | LG-L |
| Z | 49,336,598 | 49,402,049 | 0.31 | LG-U |
| Z | 51,433,170 | 51,453,731 | 0.06 | BW-L |
| Z | 51,570,218 | 52,025,021 | 0.30 | LG-U |
| Z | 53,396,549 | 53,613,767 | 0.29 | LG-U |
| Z | 54,396,787 | 54,415,100 | 0.00 | BW-L |
| Z | 54,514,962 | 54,924,783 | 0.82 | BW-U |
| Z | 54,527,007 | 54,969,616 | 0.31 | LG-U |
| Z | 55,072,139 | 55,144,749 | 0.00 | BW-L |
| Z | 55,084,066 | 55,145,974 | 0.05 | LG-L |
| Z | 55,747,328 | 55,793,032 | 0.06 | LG-L |
| Z | 55,918,219 | 55,984,468 | 0.28 | LG-U |
| Z | 57,959,535 | 58,034,588 | 0.89 | BW-U |
| Z | 60,962,983 | 60,985,386 | 0.81 | BW-U |
| Z | 61,757,609 | 62,368,193 | 0.31 | LG-U |
| Z | 62,310,380 | 62,362,213 | 0.79 | BW-U |
| Z | 62,448,231 | 62,546,884 | 0.02 | BW-L |
| Z | 63,170,909 | 63,197,666 | 0.30 | LG-U |
| Z | 63,590,847 | 64,066,815 | 0.93 | BW-U |
| Z | 63,645,413 | 63,963,994 | 0.00 | BW-L |
| Z | 63,877,426 | 63,964,530 | 0.05 | LG-L |
| Z | 64,464,665 | 64,899,635 | 0.29 | LG-U |
| Z | 65,660,899 | 65,801,895 | 0.87 | BW-U |
| Z | 66,255,023 | 66,281,778 | 0.29 | LG-U |
| Z | 67,575,161 | 67,621,643 | 0.01 | BW-L |
| Z | 67,876,700 | 67,908,061 | 0.81 | BW-U |
| Z | 68,141,546 | 69,569,848 | 0.00 | BW-L |
| Z | 68,162,306 | 68,433,138 | 0.05 | LG-L |
| Z | 68,841,648 | 68,872,079 | 0.28 | LG-U |
| Z | 69,068,804 | 69,564,869 | 0.01 | LG-L |
| Z | 71,047,809 | 71,070,199 | 0.79 | BW-U |
| Z | 72,061,998 | 72,081,848 | 0.07 | BW-L |
| Z | 72,782,943 | 72,802,648 | 0.07 | LG-L |
| Z | 81,327,880 | 81,424,699 | 0.06 | LG-L |
| Z | 81,934,185 | 81,943,896 | 0.07 | LG-L |
| Z | 82,203,476 | 82,255,866 | 0.86 | BW-U |
| Z | 83,348,332 | 83,426,842 | 0.28 | LG-U |
